# Supplementary material for: Acute Exacerbation and Respiratory InfectionS in COPD (AERIS): protocol for a prospective, observational cohort study
Source: PubMed Central journal article supplement — BMJ Open. 2014 Mar 7;4(3):e004546. doi: 10.1136/bmjopen-2013-004546 (PMC3948575; doi:10.1136/bmjopen-2013-004546), 2014-03-07
Supplement: bmjopen-2013-004546.draft_revisions.pdf [file bmjopen-2013-004546.draft_revisions.pdf]

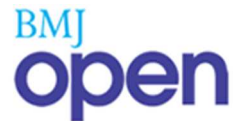

**Acute Exacerbation and Respiratory InfectionS in COPD (AERIS): a prospective, observational cohort study**

|                                 |                                                                                                                                                                                                                                                                                                                                                                                                                                                                                                                                                                                                                                            |
|---------------------------------|--------------------------------------------------------------------------------------------------------------------------------------------------------------------------------------------------------------------------------------------------------------------------------------------------------------------------------------------------------------------------------------------------------------------------------------------------------------------------------------------------------------------------------------------------------------------------------------------------------------------------------------------|
| Journal:                        | <i>BMJ Open</i>                                                                                                                                                                                                                                                                                                                                                                                                                                                                                                                                                                                                                            |
| Manuscript ID:                  | bmjopen-2013-004546                                                                                                                                                                                                                                                                                                                                                                                                                                                                                                                                                                                                                        |
| Article Type:                   | Protocol                                                                                                                                                                                                                                                                                                                                                                                                                                                                                                                                                                                                                                   |
| Date Submitted by the Author:   | 24-Nov-2013                                                                                                                                                                                                                                                                                                                                                                                                                                                                                                                                                                                                                                |
| Complete List of Authors:       | Bourne, Simon; University Hospitals Southampton, Respiratory Medicine<br>Cohet, Catherine; GSK, Vaccines<br>Kim, Viktoriya; University Hospitals Southampton, Respiratory Medicine<br>Barton, Anna; University Hospitals Southampton, Respiratory Medicine<br>Tuck, Andy; University of Southampton, Faculty of Medicine<br>Aris, Emmanuel; GSK, Vaccines<br>Mesa Vela, Sonia; GSK, Vaccines<br>Devaster, Jeanne-Marie; GSK, Vaccines<br>Ballou, Ripley; GSK, Vaccines<br>Clarke, Stuart; Public Health England,<br>Wilkinson, Tom; University of Southampton, Faculty of Medicine; University Hospitals Southampton, Respiratory Medicine |
| <b>Primary Subject Heading</b>: | Respiratory medicine                                                                                                                                                                                                                                                                                                                                                                                                                                                                                                                                                                                                                       |
| Secondary Subject Heading:      | Immunology (including allergy), Nutrition and metabolism, Infectious diseases                                                                                                                                                                                                                                                                                                                                                                                                                                                                                                                                                              |
| Keywords:                       | Respiratory infections < THORACIC MEDICINE, Immunology < THORACIC MEDICINE, Chronic airways disease < THORACIC MEDICINE                                                                                                                                                                                                                                                                                                                                                                                                                                                                                                                    |
|                                 |                                                                                                                                                                                                                                                                                                                                                                                                                                                                                                                                                                                                                                            |

SCHOLARONE™  
Manuscripts

1  
2  
3  
4  
5  
6  
7  
8  
9  
10  
11  
12  
13  
14  
15  
16  
17  
18  
19  
20  
21  
22  
23  
24  
25  
26  
27  
28  
29  
30  
31  
32  
33  
34  
35  
36  
37  
38  
39  
40  
41  
42  
43  
44  
45  
46  
47  
48  
49  
50  
51  
52  
53  
54  
55  
56  
57  
58  
59  
60

# Acute Exacerbation and Respiratory InfectionS in COPD (AERIS): a prospective, observational cohort study

Simon Bourne,<sup>1</sup> Catherine Cohet,<sup>2</sup> Viktoriya Kim,<sup>1</sup> Anna Barton,<sup>1</sup> Andy Tuck,<sup>3</sup>  
Emmanuel Aris,<sup>2</sup> Sonia Mesia Vela,<sup>2</sup> Jeanne-Marie Devaster,<sup>2</sup> W Ripley Ballou,<sup>2</sup>  
Stuart Clarke,<sup>3,4</sup> Tom Wilkinson<sup>5,6</sup>

<sup>1</sup> Respiratory Medicine, University Hospitals Southampton NHS Foundation Trust,  
Southampton, UK

<sup>2</sup> GlaxoSmithKline Vaccines, Rixensart, Belgium

<sup>3</sup> Infectious Disease Epidemiology Group, Sir Henry Wellcome Laboratories,  
Academic Unit of Clinical and Experimental Sciences, Faculty of Medicine,  
University of Southampton, Southampton, UK

<sup>4</sup> Public Health England, Southampton, UK

<sup>5</sup> Academic Unit of Clinical and Experimental Sciences, Faculty of Medicine,  
University of Southampton, Southampton, UK

<sup>6</sup> Southampton NIHR Respiratory Biomedical Research Unit, University Hospital  
Southampton Foundation NHS Trust, Southampton, UK

**Correspondence to**

Dr Tom Wilkinson MA MRCP PhD

Southampton General Hospital

Mailpoint 810, Level F, South Block

Southampton SO16 6YD

United Kingdom

Tel: +442380 795341

Email: [T.Wilkinson@soton.ac.uk](mailto:T.Wilkinson@soton.ac.uk)

**Author emails:**

Simon Bourne: [simon@soton.ac.uk](mailto:simon@soton.ac.uk)

Catherine Cohet: [CATHERINE.X.COHET@GSK.COM](mailto:CATHERINE.X.COHET@GSK.COM)

Viktoriya Kim: [v.kim@soton.ac.uk](mailto:v.kim@soton.ac.uk)

Anna Barton: [a.barton@soton.ac.uk](mailto:a.barton@soton.ac.uk)

Andy Tuck: [A.C.Tuck@soton.ac.uk](mailto:A.C.Tuck@soton.ac.uk)

Emmanuel Aris: [EMMANUEL.X.ARIS@GSK.COM](mailto:EMMANUEL.X.ARIS@GSK.COM)

Sonia Mesia Vela : [SONIA.X.MESIA-VELA@GSK.COM](mailto:SONIA.X.MESIA-VELA@GSK.COM)

Jeanne-Marie Devaster : [JEANNE-MARIE.DEVASTER@GSK.COM](mailto:JEANNE-MARIE.DEVASTER@GSK.COM)

W Ripley Ballou: [RIPLEY.W.BALLOU@GSK.COM](mailto:RIPLEY.W.BALLOU@GSK.COM)

Stuart Clarke: [S.C.Clarke@soton.ac.uk](mailto:S.C.Clarke@soton.ac.uk)

Tom Wilkinson: [T.Wilkinson@soton.ac.uk](mailto:T.Wilkinson@soton.ac.uk)

**Key words** Chronic obstructive pulmonary disease, acute exacerbation, respiratory infection, epidemiology

**Word count (excluding title page, abstract, references, figures/tables)** 3210

## ARTICLE SUMMARY

### Article focus

- Acute Exacerbation and Respiratory InfectionS in COPD (AERIS) is a prospective longitudinal epidemiological study initiated in the UK to assess how dynamic changes in the COPD airway microbiome contribute to the incidence and severity of acute exacerbations of COPD (AECOPD).

### Key messages

- There remains a genuine need to further explore the aetiology and pathogenesis of AECOPD.
- It is anticipated that results of this study will increase our understanding of the contribution of bacterial and viral pathogens to AECOPD, potentially leading to research into targeted therapeutic and preventative interventions.

### Strengths and limitations of this study

- Conducted in a specialised hospital that has extensive experience in respiratory research.
- Comprehensive assessment of clinical status, microbiology, functional status, nutritional status, health-related quality-of-life and healthcare resource utilisation in individual patients in a single large cohort during both stable COPD and AECOPD
- AECOPD are proactively identified through patient-completed electronic diaries.
- Cohort retention is a key factor in the successful delivery of such a study and with in-depth sampling protocols, participant engagement, comfort and feedback are key factors in optimising cohort retention and comprehensive data collection.

## ABSTRACT

**Introduction:** The aetiology of acute exacerbations of chronic obstructive pulmonary disease (AECOPD) remains incompletely understood and strategies for the treatment and prevention of AECOPD have not altered significantly for many years. Improved understanding of the role of respiratory pathogens in AECOPD may lead to the development of more targeted therapeutic approaches.

**Methods and analyses:** Acute Exacerbation and Respiratory InfectionS in COPD (AERIS) is a prospective longitudinal epidemiological study initiated in the UK to assess how dynamic changes in the COPD airway microbiome contribute to the incidence and severity of AECOPD. COPD patients aged 40–85 years are followed monthly for 2 years, and seen in the clinic within 72 hours of onset of symptoms of AECOPD. Exacerbations are detected using electronic diary cards that subjects complete daily. Blood, sputum, nasopharyngeal and urine samples are collected at pre-specified time-points. Molecular diagnostic and typing techniques are used to describe the dynamics of airway infection during AECOPD and stable disease, and its association with clinical outcome. This study also aims at refining the case definition of AECOPD to reflect the possible microbiological aetiology of exacerbations. The study will also assess the impact of AECOPD on health-related quality-of-life and healthcare resource utilisation, as well as the possible interaction between nutritional status, infection and cellular immune responses.

**Ethics and dissemination:** AERIS is conducted in accordance with the Declaration of Helsinki and Good Clinical Practice guidelines, and has been approved by the relevant institutional ethics and review board. All subjects must provide written informed consent. The results obtained will be disseminated by presentations at international medical conferences and peer-reviewed publications.

1  
2  
3 **Discussion:** To our knowledge, few other studies have employed real-time electronic  
4 tracking of symptoms to identify AECOPD and potential aetiological triggers. It is  
5 anticipated that results of AERIS will increase our understanding of the contribution  
6 of bacterial and viral pathogens to AECOPD, potentially leading to research into  
7 targeted therapeutic and preventative interventions.  
8  
9

10  
11  
12  
13  
14 **Registration:** ClinicalTrials.gov NCT01360398  
15  
16  
17  
18  
19  
20  
21  
22  
23  
24  
25  
26  
27  
28  
29  
30  
31  
32  
33  
34  
35  
36  
37  
38  
39  
40  
41  
42  
43  
44  
45  
46  
47  
48  
49  
50  
51  
52  
53  
54  
55  
56  
57  
58  
59  
60

## INTRODUCTION

Chronic obstructive pulmonary disease (COPD) is an inflammatory disease of the lung, characterised by progressive airflow limitation that is not fully reversible.<sup>1</sup> COPD is the most common chronic respiratory illness in older adults, affecting an estimated 210 million people worldwide.<sup>2</sup> This condition has a substantial impact on quality-of-life.<sup>2</sup> The Global Burden of Disease Study found COPD to be the third leading cause of death globally and the ninth leading cause of years of life lost due to premature mortality in 2010,<sup>3</sup> accounting for 3.7% of years lived with disability and 3.1% of disability-adjusted life years worldwide.<sup>4,5</sup> COPD also imposes a substantial socioeconomic burden. In 2001, the total cost of COPD in Europe was reported to be €38.7 billion.<sup>6</sup>

Considerable progress has been made concerning the epidemiology, pathophysiology and clinical management of COPD in recent years. However, significant challenges remain. Improved understanding of acute exacerbations of COPD (AECOPD) is a key research priority. AECOPD are highly relevant clinically, being a major cause of COPD-related morbidity and mortality,<sup>7-11</sup> as well as accounting for a substantial proportion of the significant social, healthcare and economic burden of COPD.<sup>6</sup> It has been estimated that AECOPD account for approximately 70% of total healthcare costs associated with COPD.<sup>12</sup> Patients with Global Initiative for Chronic Obstructive Lung Disease (GOLD) stage II or more disease experience 1 or 2 exacerbations annually. Exacerbation varies from patient to patient with severity of disease.<sup>13</sup> Various triggers for AECOPD have been identified;<sup>1</sup> however, up to 75% of all exacerbations are associated with the detection of bacterial and/or viral respiratory pathogens.<sup>14,15</sup> Exacerbations associated with detectable respiratory pathogens have been shown to have a more marked impact on

1  
2  
3 lung function and longer duration of hospitalisation than exacerbations of non-  
4  
5 infectious aetiology.<sup>14</sup>  
6  
7

8 With the introduction of new molecular sequencing techniques, the traditional  
9  
10 belief that healthy lungs are sterile has been refuted. There is increasing evidence that  
11  
12 the lower respiratory tract contains a diverse microbial flora that differs between  
13  
14 health and disease.<sup>16-20</sup> The presence of potentially pathogenic microorganisms in the  
15  
16 inflamed airways of patients with COPD is well-documented, with up to 50% of  
17  
18 patients with stable COPD showing evidence of lower airway bacterial colonisation  
19  
20 using traditional culture techniques.<sup>15,21,22</sup> In patients with COPD, bacterial detection  
21  
22 in lower airway derived samples is associated with increased airway inflammation,  
23  
24 reduced lung function and more frequent exacerbations.<sup>23-25</sup> Acquisition of new  
25  
26 pathogen strains also appears to be associated with an increased risk of  
27  
28 AECOPD.<sup>15,21,26</sup> Estimates of the relative contribution of different pathogens to  
29  
30 AECOPD vary. However, non-typeable *Haemophilus influenzae* appears to be the  
31  
32 major bacterial pathogen associated with AECOPD, followed by *Streptococcus*  
33  
34 *pneumoniae*, *Moraxella catarrhalis* and *Pseudomonas aeruginosa*.<sup>14,15</sup> Respiratory  
35  
36 viruses commonly associated with AECOPD include human rhinoviruses, influenza  
37  
38 and parainfluenza viruses, respiratory syncytial virus, coronavirus and adenovirus.<sup>15</sup>  
39  
40  
41  
42  
43

44 Improved understanding of the role of infectious pathogens in AECOPD may  
45  
46 lead to the development of more targeted strategies for treatment and prevention. This  
47  
48 paper describes the objectives and design of Acute Exacerbation and Respiratory  
49  
50 InfectionS in COPD (AERIS), a prospective longitudinal epidemiological study  
51  
52 initiated in the UK to assess the role of respiratory infection in acute exacerbations of  
53  
54 COPD. Molecular diagnostic and typing techniques will be used to describe the  
55  
56 dynamics of airway infection and its potential association with clinical outcome. The  
57  
58  
59  
60



study will also assess the impact of AECOPD on health-related quality-of-life and healthcare resource utilisation, as well as the possible interaction between disease endotype and exacerbations.

## OBJECTIVES

The primary objective of the AERIS study is to estimate the incidence of all-cause AECOPD and of AECOPD with sputum containing bacterial pathogens (overall and by species). Secondary study objectives are summarised in **table 1**.

**Table 1** Overview of primary and secondary objectives of the AERIS study

| Level     | Objective                                                                                                                                                                                                                                                                                                                                                                                                                                                                                                                                                                                                                                                                                                                                                                                                                                                                                                                                                      |
|-----------|----------------------------------------------------------------------------------------------------------------------------------------------------------------------------------------------------------------------------------------------------------------------------------------------------------------------------------------------------------------------------------------------------------------------------------------------------------------------------------------------------------------------------------------------------------------------------------------------------------------------------------------------------------------------------------------------------------------------------------------------------------------------------------------------------------------------------------------------------------------------------------------------------------------------------------------------------------------|
| Primary   | <ul style="list-style-type: none"> <li>To estimate the incidence rate of all-cause AECOPD</li> <li>To estimate the incidence rate of AECOPD having sputum containing bacterial pathogens (overall and by species)</li> </ul>                                                                                                                                                                                                                                                                                                                                                                                                                                                                                                                                                                                                                                                                                                                                   |
| Secondary | <ul style="list-style-type: none"> <li>To describe the proportion of overall and specific bacterial pathogens detected in sputum by severity of AECOPD</li> <li>To describe the proportion of overall and specific bacterial pathogens detected in sputum in stable COPD</li> <li>To estimate the incidence rate of AECOPD having sputum containing viral pathogens (overall and by species)</li> <li>To describe the proportion of overall and specific viral pathogens detected in sputum by severity of AECOPD</li> <li>To estimate the time elapsed between consecutive AECOPD episodes</li> <li>To assess the impact of all-cause AECOPD and stable COPD on health-related quality-of-life</li> <li>To assess the impact on healthcare use: <ul style="list-style-type: none"> <li>Of all-cause AECOPD</li> <li>Of AECOPD having sputum containing bacterial pathogens</li> <li>Of AECOPD having sputum containing viral pathogens</li> </ul> </li> </ul> |

AECOPD, acute exacerbations of chronic obstructive pulmonary disease

## METHODS

### Study design

This is an ongoing, single-centre, prospective, observational cohort study based at University Hospital Southampton, UK.

### Study population

Male and female COPD patients between the age of 40 and 85 years are eligible for study participation provided they meet the following inclusion criteria: (i) a confirmed diagnosis of COPD with post-bronchodilator forced expiratory volume in one second ( $FEV_1$ )  $\leq 80\%$  of the predicted normal value and  $FEV_1$ /forced vital capacity (FVC)  $\leq 0.7$ , consistent with GOLD stage II–IV disease,<sup>27</sup> (ii) current or ex-smoker with smoking history  $\geq 10$  pack years, and (iii) 1 or more documented exacerbations of COPD treated with antibiotics and/or steroids in the 12 months prior to enrolment (**table 2**). Exclusion criteria include other known respiratory conditions, such as asthma, as the only cause of the respiratory obstructive disorder,  $\alpha$ -1 antitrypsin deficiency, cystic fibrosis, tuberculosis, lung cancer, previous history of lung surgery and other conditions imposing pneumonia risk. Subjects on long-term antibiotic therapy at the time of enrolment and those who have received antibiotics and/or steroids in the month prior to the enrolment are also excluded.

**Table 2** Study inclusion and exclusion criteria

|                    |                                                                                                                                                                                                                                                                                                                                                                                                                                                                                                                                                                                                                                                                                                                                                                                                                                                                                                                                                                                                                                                           |
|--------------------|-----------------------------------------------------------------------------------------------------------------------------------------------------------------------------------------------------------------------------------------------------------------------------------------------------------------------------------------------------------------------------------------------------------------------------------------------------------------------------------------------------------------------------------------------------------------------------------------------------------------------------------------------------------------------------------------------------------------------------------------------------------------------------------------------------------------------------------------------------------------------------------------------------------------------------------------------------------------------------------------------------------------------------------------------------------|
| Inclusion criteria | <p>Subjects must satisfy <b>ALL</b> of the following criteria at study entry:</p> <ul style="list-style-type: none"> <li>• Subjects who the investigator believes can and will comply with the requirements of the protocol</li> <li>• Written informed consent obtained from the subject</li> <li>• Male or female aged 40–85 years</li> <li>• Confirmed diagnosis of COPD based on post-bronchodilator spirometry (Gold et al. 2009), with FEV<sub>1</sub> ≤80% of predicted normal and FEV<sub>1</sub>/FVC &lt;0.7</li> <li>• Moderate, severe, or very severe COPD, according to GOLD staging (Gold et al. 2009)</li> <li>• Current or prior history of ≥10 pack years of cigarette smoking<sup>a,b</sup></li> <li>• Documented history of ≥1 exacerbation requiring antibiotics and/or oral corticosteroids or hospitalisation in the previous 12 months<sup>c</sup></li> </ul>                                                                                                                                                                      |
| Exclusion criteria | <ul style="list-style-type: none"> <li>• A confirmed diagnosis of asthma (as only cause of obstructive respiratory disorder), cystic fibrosis, pneumonia risk factors or other respiratory disorders (e.g., tuberculosis, lung cancer)</li> <li>• History of lung surgery</li> <li>• <math>\alpha</math>-1 antitrypsin deficiency as underlying cause of COPD</li> <li>• Moderate or severe COPD exacerbation not resolved at least 1 month prior to enrolment and less than 30 days following the last dose of oral corticosteroids<sup>d</sup></li> <li>• Use of any antibacterial, antiviral or respiratory investigational drug or vaccine within 30 days of the enrolment visit</li> <li>• Evidence of alcohol or drug abuse</li> <li>• Presence of other conditions that the principal investigator judges may interfere with the study findings</li> <li>• Risk of non-compliance or inability to comply with the study procedures</li> <li>• Women who are pregnant or lactating or are planning on becoming pregnant during the study</li> </ul> |

<sup>a</sup> Former smokers are defined as those who have stopped smoking for at least 6 months

<sup>b</sup> Number of pack years = (number of cigarettes per day/20) x number of years smoked

<sup>c</sup> Subjects with recent COPD exacerbations, in stable condition, and having stopped antibiotics, can be enrolled one month post-exacerbation

<sup>d</sup> Subjects can be enrolled when their AECOPD or pneumonia has resolved

### Clinical data collection

Subjects are seen for an enrolment visit and then monthly for 2 years. Regular review of medications and, when required, changes to medical therapy and active smoking cessation advice are performed according to standard clinical practice at each visit. In addition to these scheduled visits, all subjects are seen in the clinic within 72 hours (3 days) of onset of symptoms of AECOPD. AECOPD is defined as worsening of at least 2 major symptoms (dyspnoea, sputum volume and sputum purulence) or worsening of at least 1 major symptom and 1 minor symptom (wheeze, sore throat, cold [nasal discharge and/or nasal congestion], cough and fever [oral temperature >37.5 °C] without other cause),<sup>28</sup> considered clinically relevant at the site. Exacerbations are identified by means of electronic diary cards that subjects complete daily. The data recorded daily in the electronic diary cards includes self-performed peak flow measurement (peak expiratory flow [PEF] and FEV<sub>1</sub>), a series of morning questions to identify symptoms of exacerbations<sup>29</sup> and the EXAcerbations of Chronic Pulmonary Disease Tool Version 1.0 (EXACT-PRO) at bedtime. Subjects are also asked to record any changes to their usual treatment. Data on patient-reported symptoms based on morning questions and on PEF/FEV<sub>1</sub> are transmitted daily to the study clinic. Changes/worsening in these symptoms are monitored by the study staff and subjects are contacted and invited to the clinic when an exacerbation is suspected.

### Study procedures

In addition to the daily monitoring undertaken through the patient-completed electronic diary cards, a wide range of study procedures are performed at study entry, scheduled monthly visits and exacerbation visits (**table 3**).

**Table 3** Overview of study assessments performed at the scheduled monthly visits and at exacerbation visits

| Description                                                     | Frequency of assessment*                                              |
|-----------------------------------------------------------------|-----------------------------------------------------------------------|
| Clinical variables                                              |                                                                       |
| Physical examination                                            | Monthly and within 72 hours of onset of exacerbation                  |
| Anthropometrics and nutritional screening (MUST) <sup>a</sup>   | Quarterly                                                             |
| Intercurrent comorbidities                                      | Monthly and within 72 hours of onset of exacerbation                  |
| Medical history / medical record review                         | Study entry and within 72 hours of onset of exacerbation              |
| Vaccination history                                             | Annually                                                              |
| Current medication                                              | Monthly                                                               |
| Smoking status                                                  | Monthly                                                               |
| Urine pregnancy test                                            | Study entry, final visit and within 72 hours of onset of exacerbation |
| Chest CT-scan                                                   | Study entry and final visit                                           |
| Chest X-ray                                                     | Within 72 hours of onset of exacerbation                              |
| Lung function testing                                           | Study entry and final visit                                           |
| Body box                                                        | Every 6 months and within 72 hours of onset of exacerbation           |
| TLCO <sup>b</sup>                                               | Monthly and within 72 hours of onset of exacerbation                  |
| Spirometry                                                      | Every 6 months                                                        |
| 6-minute walk test                                              | Every 6 months                                                        |
| Questionnaires                                                  |                                                                       |
| ATS-DLD-78A (Risk factors, disease history and smoking history) | Study entry                                                           |

1  
2  
3  
4  
5  
6  
7  
8  
9  
10  
11  
12  
13  
14  
15  
16  
17  
18  
19  
20  
21  
22  
23  
24  
25  
26  
27  
28  
29  
30  
31  
32  
33  
34  
35  
36  
37  
38  
39  
40  
41  
42  
43  
44  
45  
46  
47  
48  
49

|                                                   |                                                             |
|---------------------------------------------------|-------------------------------------------------------------|
| Healthcare use <sup>c</sup>                       | Monthly and within 72 hours of onset of exacerbation        |
| mMRC <sup>d</sup>                                 | Every 6 months                                              |
| CAT questionnaire <sup>e</sup>                    | Quarterly and within 72 hours of onset of exacerbation      |
| EQ-5D index and VAS <sup>f</sup>                  | Quarterly and within 72 hours of onset of exacerbation      |
| NEADL <sup>g</sup>                                | Quarterly and within 72 hours of onset of exacerbation      |
| CNAQ <sup>h</sup>                                 | Quarterly and within 72 hours of onset of exacerbation      |
| Biological specimen collection                    |                                                             |
| Blood sampling                                    | Study entry                                                 |
| For routine biochemistry                          |                                                             |
| For cell-mediated immune response                 | Quarterly and within 72 hours of onset of exacerbation      |
| For biomarkers, blood counts and haematology      | Quarterly and within 72 hours of onset of exacerbation      |
| For RNA transcript profiling                      | Every 6 months and within 72 hours of onset of exacerbation |
| For vitamins, anti-oxidants and nutrients (20 ml) | Every 6 months and within 72 hours of onset of exacerbation |
| Nasopharyngeal swab sampling <sup>i</sup>         | Monthly and within 72 hours of onset of exacerbation        |
| Sputum sampling                                   | Monthly and within 72 hours of onset of exacerbation        |
| Breath sampling <sup>j</sup>                      | Monthly and within 72 hours of onset of exacerbation        |
| Urine sampling <sup>k</sup>                       | Monthly and within 72 hours of onset of exacerbation        |

\*In addition to study entry

<sup>a</sup>Height, weight, mid-arm circumference, waist circumference, triceps skin fold measurement, fat free body mass. <sup>b</sup>TLCO: transfer factor. <sup>c</sup>Healthcare use includes medication, vaccination, oxygen therapy, use of mechanical ventilation, pulmonary rehabilitation treatment, surgical intervention, outpatient visits (including GP visit contacts to COPD team), emergency room visits, hospitalisations, and productivity loss (time missed from work or usual activities due to worsening of COPD symptoms) <sup>d</sup>mMRC: Medical Research Council Dyspnea Scale score. <sup>e</sup>CAT: COPD Assessment Test. <sup>f</sup>VAS: visual analogue scale. <sup>g</sup>NEADL: Nottingham Extended Daily Activities Scale. <sup>h</sup>CNAQ: Council on Nutrition Appetite Questionnaire. <sup>i</sup>In all subjects at study entry and in a subcohort of 30 subjects during the first year. <sup>j</sup>In a subcohort of approximately 80 subjects. <sup>k</sup>In all subjects at study entry and within 72 hours of every exacerbation and in the subcohort of 30 subjects providing nasopharyngeal swabs during the first year of the study

### *Clinical assessments*

Quantitative high-resolution computed tomography scans are performed at enrolment and study conclusion to describe the degree of bronchiectasis and emphysema resulting from COPD and to exclude other acute or evolving lung pathologies besides COPD and sequelae of COPD. A physical examination is performed at all visits. Medical history, smoking status and details of medication use are updated monthly. Influenza and pneumococcal vaccination status is updated annually.

Lung function testing is performed using spirometry, body plethysmography (lung volumes, body box) and single breath diffusion (gas transfer, TLCO) at specified visits. The following outcomes will be recorded: spirometry, FEV<sub>1</sub>, FVC, FEV<sub>1</sub>/FVC ratio, FEV<sub>1</sub> % predicted, mid expiratory flow between 25 and 75% of the forced vital capacity (MEF<sub>25-75</sub>), single breath diffusion (transfer factor [TLCO] and rate of carbon monoxide uptake [KCO]), and body plethysmography (total lung capacity [TLC], residual volume [RV], vital capacity [VC] and RV/TLC). At the enrolment visit, subjects are asked to refrain from using short-acting bronchodilators for at least 6 hours and long-acting bronchodilators for at least 12 hours before key procedures. Prior to the subsequent follow-up visits, subjects may use their usual medication normally. Lung function measurements are performed under controlled conditions and in the sitting position as per standard practice.

Anthropometrics (including but not restricted to height, weight, waist and mid-arm circumference and triceps skin-fold circumference) are measured quarterly. Grip strength and fatigability are measured using standard techniques. Anthropometric data are used to compute the Malnutrition Universal Screening Tool (MUST) score.<sup>30</sup>

1  
2  
3 Nutritional information (including planned/ unplanned weight loss, and history and  
4 changes in food intake patterns) is collected quarterly according to MUST guidelines.  
5  
6

7  
8 A postero-anterior chest X-ray (and lateral if required) is performed at all  
9 exacerbation visits, as per standard clinical practice, in order to exclude pneumonia.  
10  
11

### 12 *Questionnaires*

13  
14 Various outcomes are assessed quarterly and at exacerbation using a series of  
15 questionnaires and patient-reported outcomes instruments such as the COPD  
16 Assessment Test (CAT),<sup>31</sup> the Nottingham Extended Daily Activities Scale  
17 (NEADL),<sup>32</sup> the Council on Nutrition Appetite Questionnaire (CNAQ),<sup>33</sup> and the EQ-  
18 5D.<sup>34</sup> The BODE index (Body-Mass Index, Degree of Airflow Obstruction, Level of  
19 Functional Dyspnea, Exercise Capacity)<sup>35</sup> will also be calculated. Healthcare use is  
20 recorded at all visits, including medication, vaccination, oxygen therapy, use of  
21 mechanical ventilation, pulmonary rehabilitation treatment, surgical intervention,  
22 outpatient visits (including GP visits and telephone contacts to COPD team),  
23 emergency room visits, hospitalisations, and productivity loss (time missed from work  
24 or usual activities due to worsening of COPD symptoms). Potential changes in disease  
25 management following an exacerbation (e.g. change in medication use) are also  
26 recorded.  
27  
28  
29  
30  
31  
32  
33  
34  
35  
36  
37  
38  
39  
40  
41  
42  
43  
44  
45  
46  
47  
48  
49  
50  
51  
52  
53  
54  
55  
56  
57  
58  
59  
60



### *Biological specimen collection*

A wide range of biological specimens are collected from study participants (**table 3**). Blood samples are collected from all patients at study entry, quarterly and at exacerbation. Sputum samples are obtained by spontaneous expectoration or induced by stimulation according to standard methods from all patients at study entry, monthly and at exacerbation. Nasopharyngeal swabs are collected from all patients at study entry and then from a subcohort of 30 patients at monthly follow-up visits and at exacerbation during the first year of follow-up. Urine samples are collected from all patients at study entry and at exacerbation and from the subcohort of 30 patients at monthly follow-up visits during the first year. Breath samples are collected from approximately 80 patients (including the subcohort of 30 patients providing nasopharyngeal swabs) at monthly follow-up visits and at exacerbation visits during the first year.

Blood samples are analysed for disease-related biomarkers, biochemistry, cell-mediated immune response, RNA profile and nutrients. Sputum samples are processed by traditional culture techniques and multiplex PCR analysis for identification of potential respiratory pathogens (including, but not limited to, non-typeable *H. influenzae*, *M. catarrhalis*, *S. pneumoniae*, *P. aeruginosa*, *Staphylococcus aureus*, respiratory syncytial virus, parainfluenza virus, rhinovirus, human metapneumovirus, influenza virus, adenovirus, and coronavirus). Sputum samples may also be analysed for disease-related biomarkers. Nasopharyngeal swabs are processed by traditional culture techniques and multiplex PCR analysis for potential pathogen identification. Urine samples may be processed for disease-related biomarkers. Breath samples are analysed by the selected ion flow tube mass

1  
2  
3 spectrometry for identification of volatile organic compounds that may be  
4  
5 characteristic for AECOPD.  
6  
7

8 Laboratory assays are performed at the Public Health Laboratory of Public Health  
9  
10 England at University Hospital Southampton Foundation NHS Trust, GSK Vaccines  
11  
12 central laboratory, and other GSK Vaccines designated laboratories. The assays use  
13  
14 standardised and validated procedures. Aliquots of all biological samples are  
15  
16 processed (if applicable), frozen and stored for possible further disease-related testing.  
17  
18 Culture isolates are also stored. Any additional laboratory tests will be performed at a  
19  
20 GSK designated laboratory.  
21  
22

### 23 **Sample size calculation**

24  
25  
26 The sample size calculation was based on the primary study endpoint of incidence of  
27  
28 all-cause AECOPD. Assuming that, on average, each subject is observed for a period  
29  
30 of 18 months and that 2 episodes of AECOPD can be expected per subject per year, if  
31  
32 120 subjects are followed, the number of total person-years would be around 180 and  
33  
34 during this time around 360 exacerbation events would be detected. If the distribution  
35  
36 of events per subject follows a Poisson distribution with no overdispersion, an  
37  
38 overdispersion factor of 1.5, or an overdispersion of 2, the approximate values of the  
39  
40 lower and upper bounds of the 95% confidence interval (CI) around the point estimate  
41  
42 of 2 events per subject per year would be 1.8-2.2, 1.7-2.3, and 1.7-2.3, respectively.  
43  
44 So a sample size of 120 subjects should ensure sufficient precision in the estimation  
45  
46 of the incidence rate of all-cause AECOPDs.  
47  
48  
49  
50

51  
52 Additionally, in order to follow effectively 120 subjects, given the fact that  
53  
54 subjects may be eligible but withdraw quite early in the study possibly due to the  
55  
56  
57  
58  
59  
60

1  
2  
3 deterioration of the subject's health, the decision was taken to replace subjects who  
4  
5 withdrew during the first year of follow-up, and recruit additional subjects.  
6  
7

### 8 **Data analysis**

9  
10 The co-primary study endpoints are the occurrence of all-cause AECOPD and the  
11 occurrence of AECOPD having sputum containing bacterial pathogens as detected by  
12 culture (overall and by species). The proportion of subjects at each visit for whom a  
13 sputum sample was obtained will be computed; overall and by the method the  
14 samples were obtained (spontaneous or induced). The proportion of sputum samples  
15 obtained at each visit and positive for specific bacterial pathogens (overall and by  
16 bacterial species) will also be calculated. The incidence rate of all-cause AECOPD  
17 and of AECOPD having sputum containing bacterial pathogens (overall and by  
18 bacterial species) will be calculated, with 95% CI. The 95% CI of the incidence rate  
19 will be computed using a model which accounts for repeated events, namely the  
20 generalised linear model assuming a negative binomial distribution for the response  
21 variable with logarithm as link function, and the logarithm of time for follow-up as an  
22 offset variable as a preliminary approach. Other flexible approaches to statistical  
23 analysis may also be used. In addition, the same model with covariates (e.g. smoking  
24 status at enrolment, number of moderate/severe exacerbations reported in the 12  
25 months prior to enrolment, presence of respiratory pathogenic bacteria detected at the  
26 exacerbation visit and at previous visits) will be applied. Incidence rates will also be  
27 calculated for moderate AECOPD and for severe AECOPD.  
28  
29  
30  
31  
32  
33  
34  
35  
36  
37  
38  
39  
40  
41  
42  
43  
44  
45  
46  
47  
48  
49

### 50 **ETHICS AND DISEMINATION**

51  
52 The AERIS study is conducted in accordance with the Declaration of Helsinki and  
53 Good Clinical Practice guidelines, and has been approved by the relevant institutional  
54  
55  
56  
57  
58  
59  
60

1  
2  
3 ethics and review board. All subjects must provide written informed consent to  
4  
5 participate.  
6  
7

8 AERIS is being conducted in a specialised hospital that has extensive experience  
9  
10 in respiratory research. AECOPD are proactively identified through patient-completed  
11  
12 electronic diaries. After confirmation by phone, symptoms of an exacerbation trigger  
13  
14 a clinic visit within 72 hours of symptom onset to enable comparisons of samples  
15  
16 from same patient in stable COPD and during AECOPD. Although this is an intensive  
17  
18 study with prolonged follow up, patients are expected to benefit from the improved  
19  
20 access to expert care.  
21  
22

23  
24 The results obtained will be disseminated by presentations at international  
25  
26 medical conferences and peer-reviewed publications.  
27  
28

## 29 **DISCUSSION**

30  
31  
32 The AERIS study has been initiated to assess the role of infectious pathogens in  
33  
34 AECOPD in a well-characterised cohort of patients. The study aims at exploring the  
35  
36 dynamics of airway infection and its possible contribution to AECOPD, as well as the  
37  
38 potential role of chronic colonization in stable disease. The overall objective of the  
39  
40 study will aim at refining the case definition of AECOPD to reflect the possible  
41  
42 microbiological aetiology of exacerbations. This is of note, since there is currently no  
43  
44 commonly agreed definition of AECOPD and no current case definition includes a  
45  
46 microbiological endpoint. The impact of AECOPD on health-related quality-of-life  
47  
48 and healthcare use will be assessed in order to provide a complete picture of disease  
49  
50 burden. The interaction between airway infection and systemic manifestations of  
51  
52 COPD and nutritional status will also be assessed. Biological specimens collected  
53  
54 during the study may also be used for further disease-related testing, including  
55  
56  
57  
58  
59  
60

1  
2  
3 molecular typing to describe and compare selected biomarkers in AECOPD and stable  
4 COPD, to explore cell-mediated immune response to specific bacterial antigens, and  
5  
6  
7 to develop non-invasive bacterial diagnostic methods.  
8  
9

10 To our knowledge, few other studies have employed real-time electronic tracking  
11 of symptoms to identify AECOPD and potential aetiological triggers. This is  
12 important since available data suggest that up to 50% of exacerbations may not be  
13 reported to healthcare providers and consequently exacerbation rates are lower in  
14 studies employing event-based criteria to define AECOPD.<sup>36</sup> Due to the close daily  
15 monitoring of symptoms to identify AECOPD, we anticipate that the exacerbation  
16 rate in this study will be higher than previously reported. This close monitoring and  
17 early therapeutic intervention at exacerbation may also impact on estimates of the  
18 overall burden of disease.  
19  
20  
21  
22  
23  
24  
25  
26  
27  
28  
29

30 A number of other epidemiological studies have been initiated in recent years to  
31 further characterize our understanding of the natural history of AECOPD. However,  
32 most of these studies have not included molecular microbiological assessments.  
33 Recent large observational studies focusing on biomarker discovery have involved  
34 close phenotyping of COPD patients, but have not studied the aetiology of  
35 exacerbations in depth.<sup>37-39</sup> In another study, potentially pathogenic bacterial strains  
36 were identified using molecular typing techniques, although viruses as potential  
37 airway pathogens were not investigated.<sup>21</sup> More recently, the prevalence and load of  
38 airway bacteria in stable and exacerbated AECOPD have been assessed in paired  
39 samples from 52 patients participating in the London COPD cohort study using  
40 modern molecular techniques.<sup>19</sup> Airway bacterial prevalence and load was found to  
41 increase significantly during AECOPD, with quantitative molecular techniques  
42 proving more discriminatory than culture. However, assessment was limited to only  
43  
44  
45  
46  
47  
48  
49  
50  
51  
52  
53  
54  
55  
56  
57  
58  
59  
60

1  
2  
3 the three most commonly detected airway bacteria (*H. influenzae*, *S. pneumoniae*, and  
4  
5 *M. catarrhalis*). However, other potential pathogens and the overall respiratory  
6  
7 microbiome may also contribute and have not yet been studied in detail.<sup>17,18,20,40,41</sup> In  
8  
9 AERIS, samples will be acquired during both AECOPD and stable disease and  
10  
11 analysed for a wide range of potentially pathogenic bacteria and viruses using  
12  
13 advanced PCR-based techniques as well as traditional culture-based methods.  
14  
15

16  
17 A major strength of the AERIS study design is the comprehensive assessment of  
18  
19 clinical status, microbiology, functional status, nutritional status, health-related  
20  
21 quality-of-life and healthcare resource utilisation in individual patients in a single  
22  
23 large cohort during both stable COPD and AECOPD. The analyses proposed in this  
24  
25 study will generate epidemiological data to complement that derived from existing  
26  
27 COPD cohorts and further explore determinants of COPD and the contribution of  
28  
29 bacterial and viral pathogens to AECOPD, as well as to provide some understanding  
30  
31 of the limitations of existing data. As exacerbation visits are triggered by patient diary  
32  
33 data, accurate and timely diary completion is essential. All subjects participating in  
34  
35 this study receive diary training at enrolment and support is available from the study  
36  
37 team at all times to promote accurate and complete diary keeping. Cohort retention is  
38  
39 a key factor in the successful delivery of such a study and with in-depth sampling  
40  
41 protocols, participant engagement, comfort and feedback are key factors in optimising  
42  
43 cohort retention and comprehensive data collection.  
44  
45  
46  
47

48  
49 Identification of novel approaches for the prevention of AECOPD is an important  
50  
51 research goal. Long-acting beta-agonists (LABA) and long-acting anti-muscarinic  
52  
53 bronchodilators remain the cornerstone of treatment for patients with COPD.<sup>42</sup>  
54  
55 Combinations of LABA and inhaled corticosteroids are also used in patients with  
56  
57 more severe disease and/or frequent exacerbations. Long-term treatment with  
58  
59

1  
2  
3 macrolide antibiotics and pulsed quinolone therapy may be considered for  
4  
5 exacerbation prevention.<sup>7,43,44</sup> However, concerns exist about the potential for  
6  
7 development of antimicrobial resistance during long-term antibiotic therapy.  
8  
9 Numerous other approaches are under investigation for the prevention of AECOPD,  
10  
11 including anti-inflammatory drugs, immunomodulatory agents, immunotherapy,  
12  
13 antioxidants and non-pharmacologic strategies. Vaccination is another potential  
14  
15 approach meriting investigation for reducing AECOPD risk. However, optimal  
16  
17 strategies targeting key respiratory pathogens are not yet available to the clinician.  
18  
19

20  
21 In conclusion, there have been considerable advances in our understanding of the  
22  
23 epidemiology, pathophysiology and clinical management of COPD in recent years.  
24  
25 However, there remains a genuine need to further explore the aetiology and  
26  
27 pathogenesis of AECOPD. It is anticipated that results of this epidemiological study  
28  
29 will increase our understanding of the contribution of bacterial and viral pathogens to  
30  
31 AECOPD, potentially leading to research into targeted therapeutic and preventative  
32  
33 interventions.  
34  
35

36  
37 **Contributors S. Bourne:** principle investigator, closely involved in all steps of the  
38  
39 study and specifically wrote substantial parts of the protocol; **C. Cohet:**  
40  
41 Epidemiologist responsible for this observational study was closely involved in the  
42  
43 design of study; **V. Kim and A. Barton:** co-investigators and closely involved in the  
44  
45 conduct of this study; **A. Tuck:** site project manager for microbiology testing and  
46  
47 involved in writing of microbiology parts of the protocol; **E. Aris:** project statistician,  
48  
49 responsible for writing of statistical analysis plan and definition of statistical  
50  
51 outcomes; **S. Mesia Vela:** project manager, closely involved in the discussion on  
52  
53 design and follow-up of the study; **J-M. Devaster:** Director clinical research and  
54  
55 translational Science, closely involved in all discussions and study accountable  
56  
57  
58  
59  
60

1  
2  
3 person; **W.R. Ballou:** vice-president of clinical research and translational Science  
4  
5 team, closely involved in all discussions of design of this study. **S. Clarke:** co-  
6  
7 investigator, closely involved in all steps of the study. **T. Wilkinson:** coordinating  
8  
9 lead investigator, involved in all steps of the study.  
10

11  
12 All authors provided intellectual input into the development of this manuscript. And  
13  
14 have critically reviewed and approved the final manuscript.  
15

16  
17 **Funding** GlaxoSmithKline Biologicals SA funded this study and paid for all costs  
18  
19 associated with the development and publishing of the present manuscript.  
20

21  
22 **Competing Interests** S. Bourne, V. Kim, A. Barton, A. Tuck, S. Clarke and T.  
23  
24 Wilkinson received an institutional grant from GlaxoSmithKline (GSK) group of  
25  
26 companies to conduct this study. S. Bourne reports receiving grants, advisory board  
27  
28 fees and assistance in attending conferences from GSK. He has also received fees for  
29  
30 lecturing, advisory boards and teaching from Novartis, Astra Zeneca and Boehringer  
31  
32 Ingelheim. S. Clarke has also received project grant support, conference funding  
33  
34 attendance and advisory board payments from Pfizer, GSK and Novartis (all  
35  
36 payments were made to employing institution). T. Wilkinson has also received travel  
37  
38 expenses, fees for advisory boards GSK related to this study, fees for advisory boards  
39  
40 from Pfizer and AstraZeneca, reimbursement for travel and conference attendance  
41  
42 from Boehringer Ingelheim, consultancy fees from Almirall, and financial support  
43  
44 from Novartis and Retroscreen (travel expenses, consultancy and project support  
45  
46 costs). C. Cohet, E. Aris, S. Mesia Vela, J-M. Devaster and W.R. Ballou are  
47  
48 employed by GSK; C. Cohet, E. Aris, J-M Devaster and W.R. Ballou also report GSK  
49  
50 stock options.  
51  
52  
53  
54  
55  
56  
57  
58  
59  
60



1  
2  
3 **Acknowledgments** We wish to thank the COPD patients and their carers for their  
4 participation in this study. We also wish to acknowledge the support of the  
5 Southampton National Institute for Health Research (NIHR) Wellcome Trust Clinical  
6 Research Facility (CRF) the Southampton NIHR Biomedical Research Centre (BRC)  
7 and the NIHR Southampton Respiratory Biomedical Research Unit (RBRU). The  
8 CRF, BRC and RBRU are funded by NIHR and are a partnership between the  
9 University of Southampton and University Hospital Southampton NHS Foundation  
10 Trust (UHS). We also acknowledge Kerry Gove (University of Southampton) for lung  
11 function measurements, Dr Tony Williams (University of Southampton) for cell-  
12 mediated immunity sample capture, Dr Steve Wootton and Kesta Durkin (UHS) for  
13 nutritional assessments, Dr Stephen Harden (UHS) for supervision of CT scanning  
14 and Sister Lindsay Welch (UHS) for leading the nursing team. We thank local patient  
15 groups, including the British Lung Foundation Breathe Easy groups, for their  
16 continued support. The authors would also like to acknowledge the GSK Vaccines  
17 study team: Sylvia Taylor (epidemiology team), Pascale Lallemand and Rosalia  
18 Calamera (data management), Marcela Gavigan (clinical operations), Seona  
19 McGregor and Rebecca White (local support), Silvia Damaso and Maxim Blum  
20 (statistical support), Peter Vink (input in the design) and Marie-Josée Uwamahoro.  
21 We also thank Jennifer Coward (independent writer on behalf of GSK Vaccines) for  
22 scientific writing support and Wouter Houthoofd (XPE Pharma and Science, on  
23 behalf of GSK Vaccines) for publication coordination.  
24  
25  
26  
27  
28  
29  
30  
31  
32  
33  
34  
35  
36  
37  
38  
39  
40  
41  
42  
43  
44  
45  
46  
47  
48  
49  
50  
51  
52  
53  
54  
55  
56  
57  
58  
59  
60

**REFERENCES**

1. Decramer M, Janssens W, Miravittles M. Chronic obstructive pulmonary disease. *Lancet* 2012;379:1341–51.
2. Bousquet J, Kiley J, Bateman ED, et al. Prioritized research agenda for prevention and control of chronic respiratory diseases. *Eur Respir J* 2010;36:995–1001.
3. Lozano R, Naghavi M, Foreman K, et al. Global and regional mortality from 235 causes of death for 20 age groups in 1990 and 2010: a systemic analysis for the Global Burden of Disease Study 2010. *Lancet* 2012;380:2095–128.
4. Vos T, Flaxman AD, Lozano R, et al. Years lived with disability (YLDs) for 1160 sequelae of 289 diseases and injuries 1990–2010: a systemic analysis for the Global Burden of Disease Study 2010. *Lancet* 2012;380:2163–96.
5. Murray CJ, Vos T, Lozano R, et al. Disability-adjusted life years (DALYs) for 291 diseases and injuries in 21 regions, 1990–2010: a systemic analysis for the Global Burden of Disease Study 2010. *Lancet* 2012;380: 2197–223.
6. Loddenkemper R, Gibson GJ, Sibbille Y. European Respiratory Society/European Lung Foundation. *European Lung White Book. The First Comprehensive Survey on Respiratory Health in Europe*. Sheffield, England: European Respiratory Society Journals Ltd, 2003.
7. Seemungal TA, Wilkinson TM, Hurst JR, et al. Long-term erythromycin therapy is associated with decreased chronic obstructive pulmonary disease exacerbations. *Am J Respir Crit Care Med* 2008;178:1139–47.

- 1  
2  
3 8. Donaldson GC, Seemungal TA, Bhowmik A, Wedzicha JA. Relationship  
4 between exacerbation frequency and lung function decline in chronic obstructive  
5 pulmonary disease. *Thorax* 2002;57:847–52.  
6  
7
- 8  
9  
10 9. Miravittles M, Ferrer M, Pont A, et al. Effect of exacerbations on quality of life  
11 in patients with chronic obstructive pulmonary disease: a 2 year follow up study.  
12 *Thorax* 2004;59:387–95.  
13  
14
- 15  
16  
17 10. Soler-Cataluña JJ, Martínez-García MA, Román Sánchez P, et al. Severe acute  
18 exacerbations and mortality in patients with chronic obstructive pulmonary  
19 disease. *Thorax* 2005;60:925–31.  
20  
21
- 22  
23  
24 11. Nishimura K, Sato S, Tsukino M, et al. Effect of exacerbations on health status in  
25 subjects with chronic obstructive pulmonary disease. *Health Qual Life Outcomes*  
26 2009;7:69.  
27  
28
- 29  
30  
31 12. Sullivan SD, Ramsey SD, Lee TA. The economic burden of COPD. *Chest*  
32 2000;117(2 Suppl):5S–9S.  
33  
34
- 35  
36  
37 13. Hurst JR, Vestbo J, Anzueto A, et al. Susceptibility to exacerbation in chronic  
38 obstructive pulmonary disease. *N Engl J Med* 2010;363:1128–38.  
39  
40
- 41  
42  
43 14. Papi A, Bellettato CM, Braccioni F, et al. Infections and airway inflammation in  
44 chronic obstructive pulmonary disease severe exacerbations. *Am J Respir Crit*  
45 *Care Med* 2006;173:1114–21.  
46  
47
- 48  
49  
50 15. Sethi S, Murphy TF. Infection in the pathogenesis and course of chronic  
51 obstructive pulmonary disease. *N Engl J Med* 2008;359:2355–65.  
52  
53
- 54  
55  
56 16. Hilty M, Burke C, Pedro H, et al. Disordered microbial communities in asthmatic  
57 airways. *PLoS One* 2010;5:e8578.  
58  
59  
60

- 1  
2  
3 17. Huang YJ, Kim E, Cox MJ, et al. A persistent and diverse airway microbiota  
4 present during chronic obstructive pulmonary disease exacerbations.  
5 *OMICS* 2010;14:9–59.  
6  
7
- 8  
9  
10 18. Erb-Downward JR, Thompson DL, Han MK, et al. Analysis of the lung  
11 microbiome in the "healthy" smoker and in COPD. *PLoS One* 2011;6:e16384.  
12  
13
- 14 19. Garcha DS, Thurston SJ, Patel AR, et al. Changes in prevalence and load of  
15 airway bacteria using quantitative PCR in stable and exacerbated COPD. *Thorax*  
16 2012;67:1075–80.  
17  
18
- 19 20. Pragman AA, Kim HB, Reilly CS, et al. The lung microbiome in moderate and  
20 severe chronic obstructive pulmonary disease. *PLoS One* 2012;7:e47305.  
21  
22
- 23 21. Sethi S, Evans N, Grant BJ, Murphy TF. New strains of bacteria and  
24 exacerbations of chronic obstructive pulmonary disease. *N Engl J Med*  
25 2002;347:465–71.  
26  
27
- 28 22. Rosell A, Monsó E, Soler N, et al. Microbiologic determinants of exacerbation in  
29 chronic obstructive pulmonary disease. *Arch Intern Med* 2005;165:891–97.  
30  
31
- 32 23. Patel IS, Seemungal TA, Wilks M, et al. Relationship between bacterial  
33 colonisation and the frequency, character, and severity of COPD exacerbations.  
34 *Thorax* 2002;57:759–64.  
35  
36
- 37 24. Wilkinson TM, Patel IS, Wilks M, et al. Airway bacterial load and FEV1 decline  
38 in patients with chronic obstructive pulmonary disease. *Am J Respir Crit Care*  
39 *Med* 2003;167:1090–5.  
40  
41
- 42 25. Marin A, Garcia-Aymerich J, Sauleda J, et al. Effect of bronchial colonisation on  
43 airway and systemic inflammation in stable COPD. *COPD* 2012;9:121–30.  
44  
45  
46  
47  
48  
49  
50  
51  
52  
53  
54  
55  
56  
57  
58  
59  
60

- 1  
2  
3  
4  
5  
6  
7  
8  
9  
10  
11  
12  
13  
14  
15  
16  
17  
18  
19  
20  
21  
22  
23  
24  
25  
26  
27  
28  
29  
30  
31  
32  
33  
34  
35  
36  
37  
38  
39  
40  
41  
42  
43  
44  
45  
46  
47  
48  
49  
50  
51  
52  
53  
54  
55  
56  
57  
58  
59  
60
26. Sethi S, Sethi R, Eschberger K, et al. Airway bacterial concentrations and exacerbations of chronic obstructive pulmonary disease. *Am J Respir Crit Care Med* 2007;176:356–61.
  27. Global Initiative for Chronic Obstructive Lung Disease, Inc. Global strategy for the diagnosis, management, and prevention of COPD (Revised 2011). [http://www.goldcopd.org/uploads/users/files/GOLD\\_Report\\_2011\\_Feb21.pdf](http://www.goldcopd.org/uploads/users/files/GOLD_Report_2011_Feb21.pdf) (accessed 4 Oct 2013).
  28. Anthonisen NR, Manfreda J, Warren CP, et al. Antibiotic therapy in exacerbations of chronic obstructive pulmonary disease. *Ann Intern Med* 1987;106:196–204.
  29. Wilkinson TM, Donaldson GC, Hurst JR, et al. Early therapy improves outcomes of exacerbations of chronic obstructive pulmonary disease. *Am J Respir Crit Care Med* 2004;169:1298–1303.
  30. BAPEN. The MUST toolkit. <http://www.bapen.org.uk/screening-for-malnutrition/must/must-toolkit/the-must-itself> (accessed 4 Oct 2013).
  31. Jones PW, Brusselle G, Dal Negro RW, et al. Properties of the COPD assessment test in a cross-sectional European study. *Eur Respir J* 2011;38:29–35.
  32. Nouri FM, Lincoln NB. An extended activities of daily living scale for stroke patients. *Clinical Rehab* 1987;1:301–5.
  33. Wilson MM, Thomas DR, Rubenstein LZ, et al. Appetite assessment: simple appetite questionnaire predicts weight loss in community-dwelling adults and nursing home residents. *Am J Clin Nutr* 2005;82:1074–81.

- 1  
2  
3 34. The EuroQol Group. EuroQol – a new facility for the measurement of health-  
4 related quality of life. *Health Policy* 1990;16:199–208.  
5  
6  
7  
8 35. Celli BR, Cote CG, Marin JM, et al. The body-mass index, airflow obstruction,  
9 dyspnea, and exercise capacity index in chronic obstructive pulmonary disease. *N*  
10 *Engl J Med* 2004;350:1005–12.  
11  
12  
13  
14  
15 36. Hurst JR, Wedzicha JA. An introduction to conducting COPD exacerbation  
16 research. *Respir Med: COPD Update* 2009;5:38–44.  
17  
18  
19  
20 37. Vestbo J, Anderson W, Coxson HO, et al. Evaluation of COPD longitudinally to  
21 identify predictive surrogate end-points (ECLIPSE). *Eur Respir J* 2008;31:869–  
22 73.  
23  
24  
25  
26  
27 38. Regan EA, Hokanson JE, Murphy JR, et al. Genetic epidemiology of COPD  
28 (COPDGene) study design. *COPD* 2010;7:32–43.  
29  
30  
31  
32 39. Woodruff PG. Novel outcomes and end points: biomarkers in chronic obstructive  
33 pulmonary disease clinical trials. *Proc Am Thorac Soc* 2011; 8:350–5.  
34  
35  
36  
37 40. Beasley V, Joshi PV, Singanayagam A, et al. Lung microbiology and  
38 exacerbations in COPD. *Int J Chron Obstruct Pulmon Dis* 2012;7:555–69.  
39  
40  
41  
42 41. Mackay AJ, Hurst JR. COPD exacerbations: causes, prevention, and treatment.  
43 *Med Clin North Am* 2012;96:789–809.  
44  
45  
46  
47 42. Global Initiative for Chronic Obstructive Lung Disease, Inc. Global strategy for  
48 the diagnosis, management, and prevention of COPD (Updated 2013).  
49 [http://www.goldcopd.org/uploads/users/files/GOLD\\_Report\\_2013\\_Feb20.pdf](http://www.goldcopd.org/uploads/users/files/GOLD_Report_2013_Feb20.pdf)  
50 (accessed 4 Oct 2013).  
51  
52  
53  
54  
55  
56  
57  
58  
59  
60

- 1  
2  
3 43. Sethi S, Jones PW, Theron MS, et al. Pulsed moxifloxacin for the prevention of  
4  
5 exacerbations of chronic obstructive pulmonary disease: a randomized controlled  
6  
7 trial. *Respir Res* 2010;11:10.  
8  
9  
10 44. Albert RK, Connett J, Bailey WC, et al. Azithromycin for prevention of  
11  
12 exacerbations of COPD. *N Engl J Med* 2011;365:689–98.  
13  
14  
15  
16  
17  
18  
19  
20  
21  
22  
23  
24  
25  
26  
27  
28  
29  
30  
31  
32  
33  
34  
35  
36  
37  
38  
39  
40  
41  
42  
43  
44  
45  
46  
47  
48  
49  
50  
51  
52  
53  
54  
55  
56  
57  
58  
59  
60

For peer review only



**Acute Exacerbation and Respiratory InfectionS in COPD (AERIS): protocol for a prospective, observational cohort study**

|                                 |                                                                                                                                                                                                                                                                                                                                                                                                                                                                                                                                                                                                                                            |
|---------------------------------|--------------------------------------------------------------------------------------------------------------------------------------------------------------------------------------------------------------------------------------------------------------------------------------------------------------------------------------------------------------------------------------------------------------------------------------------------------------------------------------------------------------------------------------------------------------------------------------------------------------------------------------------|
| Journal:                        | <i>BMJ Open</i>                                                                                                                                                                                                                                                                                                                                                                                                                                                                                                                                                                                                                            |
| Manuscript ID:                  | bmjopen-2013-004546.R1                                                                                                                                                                                                                                                                                                                                                                                                                                                                                                                                                                                                                     |
| Article Type:                   | Protocol                                                                                                                                                                                                                                                                                                                                                                                                                                                                                                                                                                                                                                   |
| Date Submitted by the Author:   | 12-Feb-2014                                                                                                                                                                                                                                                                                                                                                                                                                                                                                                                                                                                                                                |
| Complete List of Authors:       | Bourne, Simon; University Hospitals Southampton, Respiratory Medicine<br>Cohet, Catherine; GSK, Vaccines<br>Kim, Viktoriya; University Hospitals Southampton, Respiratory Medicine<br>Barton, Anna; University Hospitals Southampton, Respiratory Medicine<br>Tuck, Andy; University of Southampton, Faculty of Medicine<br>Aris, Emmanuel; GSK, Vaccines<br>Mesa Vela, Sonia; GSK, Vaccines<br>Devaster, Jeanne-Marie; GSK, Vaccines<br>Ballou, Ripley; GSK, Vaccines<br>Clarke, Stuart; Public Health England,<br>Wilkinson, Tom; University of Southampton, Faculty of Medicine; University Hospitals Southampton, Respiratory Medicine |
| <b>Primary Subject Heading</b>: | Respiratory medicine                                                                                                                                                                                                                                                                                                                                                                                                                                                                                                                                                                                                                       |
| Secondary Subject Heading:      | Immunology (including allergy), Nutrition and metabolism, Infectious diseases                                                                                                                                                                                                                                                                                                                                                                                                                                                                                                                                                              |
| Keywords:                       | Respiratory infections < THORACIC MEDICINE, Immunology < THORACIC MEDICINE, Chronic airways disease < THORACIC MEDICINE                                                                                                                                                                                                                                                                                                                                                                                                                                                                                                                    |
|                                 |                                                                                                                                                                                                                                                                                                                                                                                                                                                                                                                                                                                                                                            |

SCHOLARONE™  
Manuscripts



1  
2  
3  
4  
5  
6  
7  
8  
9  
10  
11  
12  
13  
14  
15  
16  
17  
18  
19  
20  
21  
22  
23  
24  
25  
26  
27  
28  
29  
30  
31  
32  
33  
34  
35  
36  
37  
38  
39  
40  
41  
42  
43  
44  
45  
46  
47  
48  
49  
50  
51  
52  
53  
54  
55  
56  
57  
58  
59  
60

# Acute Exacerbation and Respiratory InfectionS in COPD (AERIS): protocol for a prospective, observational cohort study

Simon Bourne,<sup>1</sup> Catherine Cohet,<sup>2</sup> Viktoriya Kim,<sup>1</sup> Anna Barton,<sup>1</sup> Andy Tuck,<sup>3</sup>  
Emmanuel Aris,<sup>2</sup> Sonia Mesia Vela,<sup>2</sup> Jeanne-Marie Devaster,<sup>2</sup> W Ripley Ballou,<sup>2</sup>  
Stuart Clarke,<sup>3,4</sup> Tom Wilkinson<sup>5,6</sup>

<sup>1</sup> Respiratory Medicine, University Hospitals Southampton NHS Foundation Trust,  
Southampton, UK

<sup>2</sup> GlaxoSmithKline Vaccines, Rixensart, Belgium

<sup>3</sup> Infectious Disease Epidemiology Group, Sir Henry Wellcome Laboratories,  
Academic Unit of Clinical and Experimental Sciences, Faculty of Medicine,  
University of Southampton, Southampton, UK

<sup>4</sup> Public Health England, Southampton, UK

<sup>5</sup> Academic Unit of Clinical and Experimental Sciences, Faculty of Medicine,  
University of Southampton, Southampton, UK

<sup>6</sup> Southampton NIHR Respiratory Biomedical Research Unit, University Hospital  
Southampton Foundation NHS Trust, Southampton, UK

**Correspondence to**

Dr Tom Wilkinson MA MRCP PhD

Southampton General Hospital

Mailpoint 810, Level F, South Block

Southampton SO16 6YD

United Kingdom

Tel: +442380 795341

Email: [T.Wilkinson@soton.ac.uk](mailto:T.Wilkinson@soton.ac.uk)

**Author emails:**

Simon Bourne: [simon@soton.ac.uk](mailto:simon@soton.ac.uk)

Catherine Cohet: [CATHERINE.X.COHET@GSK.COM](mailto:CATHERINE.X.COHET@GSK.COM)

Viktoriya Kim: [v.kim@soton.ac.uk](mailto:v.kim@soton.ac.uk)

Anna Barton: [a.barton@soton.ac.uk](mailto:a.barton@soton.ac.uk)

Andy Tuck: [A.C.Tuck@soton.ac.uk](mailto:A.C.Tuck@soton.ac.uk)

Emmanuel Aris: [EMMANUEL.X.ARIS@GSK.COM](mailto:EMMANUEL.X.ARIS@GSK.COM)

Sonia Mesia Vela : [SONIA.X.MESIA-VELA@GSK.COM](mailto:SONIA.X.MESIA-VELA@GSK.COM)

Jeanne-Marie Devaster : [JEANNE-MARIE.DEVASTER@GSK.COM](mailto:JEANNE-MARIE.DEVASTER@GSK.COM)

W Ripley Ballou: [RIPLEY.W.BALLOU@GSK.COM](mailto:RIPLEY.W.BALLOU@GSK.COM)

Stuart Clarke: [S.C.Clarke@soton.ac.uk](mailto:S.C.Clarke@soton.ac.uk)

Tom Wilkinson: [T.Wilkinson@soton.ac.uk](mailto:T.Wilkinson@soton.ac.uk)

**Key words** Chronic obstructive pulmonary disease, acute exacerbation, respiratory infection, epidemiology

**Word count (excluding title page, abstract, references, figures/tables)** 3210

## ABSTRACT

**Introduction:** The aetiology of acute exacerbations of COPD remains incompletely understood and strategies for treatment and prevention have not altered significantly for many years. Improved understanding of the role of respiratory pathogens in AECOPD is required and the use of molecular microbiological techniques may lead to insights into host–pathogen interactions and the development of more targeted therapeutic approaches.

**Methods and analyses:** Acute Exacerbation and Respiratory InfectionS in COPD (AERIS) is a longitudinal epidemiological study to assess how changes in the COPD airway microbiome contribute to the incidence and severity of AECOPD. COPD patients aged 40–85 are followed monthly for 2 years, and reviewed within 72 hours of onset of symptoms of AECOPD. Exacerbations are detected using daily electronic diary cards. Blood, sputum, nasopharyngeal and urine samples are collected at pre-specified time-points. Molecular diagnostic and typing techniques are used to describe the dynamics of airway infection during AECOPD and stable disease, and associations with clinical outcome. This study aims to refine the case definition of AECOPD to reflect the possible microbiological aetiology. AERIS will assess the impact of AECOPD on health-related quality-of-life and healthcare resource utilisation, and the possible interactions between nutritional status, infection and immune responses.

**Ethics and dissemination:** AERIS is conducted in accordance with the Declaration of Helsinki and GCP, and has been approved by the institutional ethics and review board. All subjects must provide written informed consent. The results obtained will be disseminated at international medical conferences and in peer-reviewed publications.

1  
2  
3 **Discussion:** Few other studies have addressed the complexity of the microbiological  
4 and systemic components of COPD or employed real-time electronic tracking of  
5 symptoms to identify AECOPD and potential aetiological triggers. Results of AERIS  
6 will increase our understanding of the contribution of pathogens to AECOPD,  
7 potentially leading to new targeted therapeutic and preventative interventions.  
8  
9

10  
11  
12  
13  
14 **Registration:** ClinicalTrials.gov NCT01360398  
15  
16  
17  
18  
19

## 20 **ARTICLE SUMMARY**

### 21 **Article focus**

- 22  
23  
24  
25  
26 • Acute Exacerbation and Respiratory InfectionS in COPD (AERIS) is a  
27 prospective longitudinal epidemiological study initiated in the UK to assess how  
28 dynamic changes in the COPD airway microbiome contribute to the incidence  
29 and severity of acute exacerbations of COPD (AECOPD).  
30  
31  
32  
33  
34

### 35 **Key messages**

- 36  
37  
38 • There remains a genuine need to further explore the aetiology and pathogenesis  
39 of AECOPD.  
40  
41  
42  
43 • It is anticipated that results of this study will increase our understanding of the  
44 contribution of bacterial and viral pathogens to AECOPD, potentially leading to  
45 research into targeted therapeutic and preventative interventions.  
46  
47  
48  
49  
50  
51  
52  
53  
54  
55  
56  
57  
58  
59  
60

**Strengths and limitations of this study**

- Conducted in a specialised hospital that has extensive experience in respiratory research.
- Comprehensive assessment of clinical status, microbiology, functional status, nutritional status, health-related quality-of-life and healthcare resource utilisation in individual patients in a single large cohort during both stable COPD and AECOPD
- AECOPD are proactively identified through patient-completed electronic diaries.
- Cohort retention is a key factor in the successful delivery of such a study and with in-depth sampling protocols, participant engagement, comfort and feedback are key factors in optimising cohort retention and comprehensive data collection.

## INTRODUCTION

Chronic obstructive pulmonary disease (COPD) is an inflammatory disease of the lung, characterised by progressive airflow limitation that is not fully reversible.<sup>1</sup> COPD is the most common chronic respiratory illness in older adults, affecting an estimated 210 million people worldwide.<sup>2</sup> This condition has a substantial impact on quality-of-life.<sup>2</sup> The Global Burden of Disease Study found COPD to be the third leading cause of death globally and the ninth leading cause of years of life lost due to premature mortality in 2010,<sup>3</sup> accounting for 3.7% of years lived with disability and 3.1% of disability-adjusted life years worldwide.<sup>4,5</sup> COPD also imposes a substantial socioeconomic burden. In 2001, the total cost of COPD in Europe was reported to be €38.7 billion.<sup>6</sup>

Considerable progress has been made concerning the epidemiology, pathophysiology and clinical management of COPD in recent years. However, significant challenges remain. Improved understanding of acute exacerbations of COPD (AECOPD) is a key research priority. AECOPD are highly relevant clinically, being a major cause of COPD-related morbidity and mortality,<sup>7-11</sup> as well as accounting for a substantial proportion of the significant social, healthcare and economic burden of COPD.<sup>6</sup> It has been estimated that AECOPD account for approximately 70% of total healthcare costs associated with COPD.<sup>12</sup> Patients with Global Initiative for Chronic Obstructive Lung Disease (GOLD) stage II or more disease experience 1 or 2 exacerbations annually. Exacerbation varies from patient to patient with severity of disease.<sup>13</sup> Various triggers for AECOPD have been identified;<sup>1</sup> however, up to 75% of all exacerbations are associated with the detection

1  
2  
3 of bacterial and/or viral respiratory pathogens.<sup>14,15</sup> Exacerbations associated with  
4  
5 detectable respiratory pathogens have been shown to have a more marked impact on  
6  
7 lung function and longer duration of hospitalisation than exacerbations of non-  
8  
9 infectious aetiology.<sup>14</sup>  
10

11  
12 With the introduction of new molecular sequencing techniques, the traditional  
13  
14 belief that healthy lungs are sterile has been refuted. There is increasing evidence that  
15  
16 the lower respiratory tract contains a diverse microbial flora that differs between  
17  
18 health and disease.<sup>16-20</sup> The presence of potentially pathogenic microorganisms in the  
19  
20 inflamed airways of patients with COPD is well-documented, with up to 50% of  
21  
22 patients with stable COPD showing evidence of lower airway bacterial colonisation  
23  
24 using traditional culture techniques.<sup>15,21,22</sup> In patients with COPD, bacterial detection  
25  
26 in lower airway derived samples is associated with increased airway inflammation,  
27  
28 reduced lung function and more frequent exacerbations.<sup>23-25</sup> Acquisition of new  
29  
30 pathogen strains also appears to be associated with an increased risk of  
31  
32 AECOPD.<sup>15,21,26</sup> Estimates of the relative contribution of different pathogens to  
33  
34 AECOPD vary. However, non-typeable *Haemophilus influenzae* appears to be the  
35  
36 major bacterial pathogen associated with AECOPD, followed by *Streptococcus*  
37  
38 *pneumoniae*, *Moraxella catarrhalis* and *Pseudomonas aeruginosa*.<sup>14,15</sup> Respiratory  
39  
40 viruses commonly associated with AECOPD are diverse and include human  
41  
42 rhinoviruses, influenza and parainfluenza viruses, respiratory syncytial virus,  
43  
44 coronavirus and adenovirus.<sup>15</sup>  
45  
46  
47  
48  
49

50  
51 Improved understanding of the role of infectious pathogens in AECOPD is  
52  
53 required to better understand the pathophysiology of the disease and may lead to the  
54  
55 development of more targeted strategies for treatment and prevention. This paper  
56  
57 describes the objectives and design of Acute Exacerbation and Respiratory InfectionS  
58  
59

in COPD (AERIS), a prospective longitudinal epidemiological study initiated in the UK to assess the role of respiratory infection in acute exacerbations of COPD. Molecular diagnostic and typing techniques will be used to describe the dynamics of airway infection and its potential association with clinical outcome. The study will also assess the impact of AECOPD on health-related quality-of-life and healthcare resource utilisation, as well as the possible interaction between disease endotype and exacerbations.

## OBJECTIVES

The primary objective of the AERIS study is to estimate the incidence of all-cause AECOPD and of AECOPD with sputum containing bacterial pathogens (overall and by species). Secondary study objectives are summarised in **table 1**.

**Table 1** Overview of primary and secondary objectives of the AERIS study

| Level     | Objective                                                                                                                                                                                                                                                                                                                                                                                                                                                                                                                                                                                                                                                                                                                                                                                                                          |
|-----------|------------------------------------------------------------------------------------------------------------------------------------------------------------------------------------------------------------------------------------------------------------------------------------------------------------------------------------------------------------------------------------------------------------------------------------------------------------------------------------------------------------------------------------------------------------------------------------------------------------------------------------------------------------------------------------------------------------------------------------------------------------------------------------------------------------------------------------|
| Primary   | <ul style="list-style-type: none"> <li>To estimate the incidence rate of all-cause AECOPD</li> <li>To estimate the incidence rate of AECOPD having sputum containing bacterial pathogens (overall and by species)</li> </ul>                                                                                                                                                                                                                                                                                                                                                                                                                                                                                                                                                                                                       |
| Secondary | <ul style="list-style-type: none"> <li>To describe the proportion of overall and specific bacterial pathogens detected in sputum by severity of AECOPD</li> <li>To describe the proportion of overall and specific bacterial pathogens detected in sputum in stable COPD</li> <li>To estimate the incidence rate of AECOPD having sputum containing viral pathogens (overall and by species)</li> <li>To describe the proportion of overall and specific viral pathogens detected in sputum by severity of AECOPD</li> <li>To estimate the time elapsed between consecutive AECOPD episodes</li> <li>To assess the impact of all-cause AECOPD and stable COPD on health-related quality-of-life</li> <li>To assess the impact on healthcare use: <ul style="list-style-type: none"> <li>Of all-cause AECOPD</li> </ul> </li> </ul> |



- Of AECOPD having sputum containing bacterial pathogens
  - Of AECOPD having sputum containing viral pathogens
- 

AECOPD, acute exacerbations of chronic obstructive pulmonary disease

## METHODS

### Study design

This is an ongoing, single-centre, prospective, observational cohort study based at University Hospital Southampton, UK.

### Study population

Male and female COPD patients between the age of 40 and 85 years are eligible for study participation provided they meet the following inclusion criteria: (i) a confirmed diagnosis of COPD with post-bronchodilator forced expiratory volume in one second ( $FEV_1$ )  $\leq 80\%$  of the predicted normal value and  $FEV_1$ /forced vital capacity (FVC)  $\leq 0.7$ , consistent with GOLD stage II–IV disease,<sup>27</sup> (ii) current or ex-smoker with smoking history  $\geq 10$  pack years, and (iii) 1 or more documented exacerbations of COPD treated with antibiotics and/or steroids in the 12 months prior to enrolment (**table 2**). Subjects with recent COPD exacerbations, in stable condition, and having stopped antibiotics, can be enrolled one month post-exacerbation. Exclusion criteria include other known respiratory conditions, such as asthma, as the only cause of the respiratory obstructive disorder,  $\alpha$ -1 antitrypsin deficiency, cystic fibrosis, tuberculosis, lung cancer, previous history of lung surgery and other conditions imposing pneumonia risk. Subjects on long-term corticosteroid or antibiotic therapy at the time of enrolment and those who have received antibiotics and/or steroids in the month prior to the enrolment are also excluded.

**Table 2** Study inclusion and exclusion criteria

|                    |                                                                                                                                                                                                                                                                                                                                                                                                                                                                                                                                                                                                                                                                                                                                                                                                                                                                                                                                                                                                                                                                                                                     |
|--------------------|---------------------------------------------------------------------------------------------------------------------------------------------------------------------------------------------------------------------------------------------------------------------------------------------------------------------------------------------------------------------------------------------------------------------------------------------------------------------------------------------------------------------------------------------------------------------------------------------------------------------------------------------------------------------------------------------------------------------------------------------------------------------------------------------------------------------------------------------------------------------------------------------------------------------------------------------------------------------------------------------------------------------------------------------------------------------------------------------------------------------|
| Inclusion criteria | <p>Subjects must satisfy <i>ALL</i> of the following criteria at study entry:</p> <ul style="list-style-type: none"> <li>• Subjects who the investigator believes can and will comply with the requirements of the protocol</li> <li>• Written informed consent obtained from the subject</li> <li>• Male or female aged 40–85 years</li> <li>• Confirmed diagnosis of COPD based on post-bronchodilator spirometry (Gold et al. 2009), with FEV<sub>1</sub> ≤80% of predicted normal and FEV<sub>1</sub>/FVC &lt;0.7</li> <li>• Moderate, severe, or very severe COPD, according to GOLD staging (Gold et al. 2009)</li> <li>• Current or prior history of ≥10 pack years of cigarette smoking<sup>a,b</sup></li> <li>• Documented history of ≥1 exacerbation requiring antibiotics and/or oral corticosteroids or hospitalisation in the previous 12 months<sup>c</sup></li> </ul>                                                                                                                                                                                                                                |
| Exclusion criteria | <ul style="list-style-type: none"> <li>• A confirmed diagnosis of asthma (as only cause of obstructive respiratory disorder), cystic fibrosis, pneumonia risk factors or other respiratory disorders (e.g., tuberculosis, lung cancer)</li> <li>• History of lung surgery</li> <li>• <math>\alpha</math>-1 antitrypsin deficiency as underlying cause of COPD</li> <li>• Moderate or severe COPD exacerbation not resolved at least 1 month prior to enrolment and less than 30 days following the last dose of oral corticosteroids<sup>d</sup></li> <li>• Long-term corticosteroid or antibiotic therapy</li> <li>• Use of any antibacterial, antiviral or respiratory investigational drug or vaccine within 30 days of the enrolment visit</li> <li>• Evidence of alcohol or drug abuse</li> <li>• Presence of other conditions that the principal investigator judges may interfere with the study findings</li> <li>• Risk of non-compliance or inability to comply with the study procedures</li> <li>• Women who are pregnant or lactating or are planning on becoming pregnant during the study</li> </ul> |

<sup>a</sup> Former smokers are defined as those who have stopped smoking for at least 6 months

<sup>b</sup> Number of pack years = (number of cigarettes per day/20) x number of years smoked

<sup>c</sup> Subjects with recent COPD exacerbations, in stable condition, and having stopped antibiotics, can be enrolled one month post-exacerbation

<sup>d</sup> Subjects can be enrolled when their AECOPD or pneumonia has resolved

### Clinical data collection

Subjects are seen for an enrolment visit and then monthly for 2 years. Regular review of medications and, when required, changes to medical therapy and active smoking cessation advice are performed according to standard clinical practice at each visit. In addition to these scheduled visits, all subjects are seen in the clinic within 72 hours (3 days) of onset of symptoms of AECOPD. AECOPD is defined as worsening of at least 2 major symptoms (dyspnoea, sputum volume and sputum purulence) or worsening of at least 1 major symptom and 1 minor symptom (wheeze, sore throat, cold [nasal discharge and/or nasal congestion], cough and fever [oral temperature >37.5 °C] without other cause),<sup>28</sup> considered clinically relevant at the site. Exacerbations are identified by means of electronic diary cards that subjects complete daily. The data recorded daily in the electronic diary cards includes self-performed peak flow measurement (peak expiratory flow [PEF] and FEV<sub>1</sub>), a series of morning questions to identify symptoms of exacerbations<sup>29</sup> and the EXAcerbations of Chronic Pulmonary Disease Tool Version 1.0 (EXACT-PRO) at bedtime. Subjects are also asked to record any changes to their usual treatment. Data on patient-reported symptoms based on morning questions and on PEF/FEV<sub>1</sub> are transmitted daily to the study clinic. Changes/worsening in these symptoms are monitored by the study staff and subjects are contacted and invited to the clinic when an exacerbation is suspected.

### Study procedures

In addition to the daily monitoring undertaken through the patient-completed electronic diary cards, a wide range of study procedures are performed at study entry, scheduled monthly visits and exacerbation visits (**table 3**).

**Table 3** Overview of study assessments performed at the scheduled monthly visits and at exacerbation visits

| Description                                                     | Frequency of assessment*                                              |
|-----------------------------------------------------------------|-----------------------------------------------------------------------|
| Clinical variables                                              |                                                                       |
| Physical examination                                            | Monthly and within 72 hours of onset of exacerbation                  |
| Anthropometrics and nutritional screening (MUST) <sup>a</sup>   | Quarterly                                                             |
| Intercurrent comorbidities                                      | Monthly and within 72 hours of onset of exacerbation                  |
| Medical history / medical record review                         | Study entry and within 72 hours of onset of exacerbation              |
| Vaccination history                                             | Annually                                                              |
| Current medication                                              | Monthly                                                               |
| Smoking status                                                  | Monthly                                                               |
| Urine pregnancy test                                            | Study entry, final visit and within 72 hours of onset of exacerbation |
| Chest CT-scan                                                   | Study entry and final visit                                           |
| Chest X-ray                                                     | Within 72 hours of onset of exacerbation                              |
| Lung function testing                                           | Study entry and final visit                                           |
| Body box                                                        | Every 6 months and within 72 hours of onset of exacerbation           |
| TLCO <sup>b</sup>                                               | Monthly and within 72 hours of onset of exacerbation                  |
| Spirometry                                                      | Every 6 months                                                        |
| 6-minute walk test                                              |                                                                       |
| Questionnaires and patient-reported outcome instruments         |                                                                       |
| ATS-DLD-78A (Risk factors, disease history and smoking history) | Study entry                                                           |

1  
2  
3  
4  
5  
6  
7  
8  
9  
10  
11  
12  
13  
14  
15  
16  
17  
18  
19  
20  
21  
22  
23  
24  
25  
26  
27  
28  
29  
30  
31  
32  
33  
34  
35  
36  
37  
38  
39  
40  
41  
42  
43  
44  
45  
46  
47  
48  
49

|                                           |                                                   |                                                             |
|-------------------------------------------|---------------------------------------------------|-------------------------------------------------------------|
| Healthcare use <sup>c</sup>               |                                                   | Monthly and within 72 hours of onset of exacerbation        |
| mMRC <sup>d</sup>                         |                                                   | Every 6 months                                              |
| CAT questionnaire <sup>e</sup>            |                                                   | Quarterly and within 72 hours of onset of exacerbation      |
| EQ-5D index and VAS <sup>f</sup>          |                                                   | Quarterly and within 72 hours of onset of exacerbation      |
| NEADL <sup>g</sup>                        |                                                   | Quarterly and within 72 hours of onset of exacerbation      |
| CNAQ <sup>h</sup>                         |                                                   | Quarterly and within 72 hours of onset of exacerbation      |
| Biological specimen collection            |                                                   |                                                             |
| Blood sampling                            | For routine biochemistry                          | Study entry                                                 |
|                                           | For cell-mediated immune response                 | Quarterly and within 72 hours of onset of exacerbation      |
|                                           | For biomarkers, blood counts and haematology      | Quarterly and within 72 hours of onset of exacerbation      |
|                                           | For RNA transcript profiling                      | Every 6 months and within 72 hours of onset of exacerbation |
|                                           | For vitamins, anti-oxidants and nutrients (20 ml) | Every 6 months and within 72 hours of onset of exacerbation |
| Nasopharyngeal swab sampling <sup>i</sup> |                                                   | Monthly and within 72 hours of onset of exacerbation        |
| Sputum sampling                           |                                                   | Monthly and within 72 hours of onset of exacerbation        |
| Breath sampling <sup>j</sup>              |                                                   | Monthly and within 72 hours of onset of exacerbation        |
| Urine sampling <sup>k</sup>               |                                                   | Monthly and within 72 hours of onset of exacerbation        |

\*In addition to study entry

<sup>a</sup>Height, weight, mid-arm circumference, waist circumference, triceps skin fold measurement, fat free body mass. <sup>b</sup>TLCO: transfer factor. <sup>c</sup>Healthcare use includes medication, vaccination, oxygen therapy, use of mechanical ventilation, pulmonary rehabilitation treatment, surgical intervention, outpatient visits (including GP visit contacts to COPD team), emergency room visits, hospitalisations, and productivity loss (time missed from work or usual activities due to worsening of COPD symptoms) <sup>d</sup>mMRC: Medical Research Council Dyspnea Scale score. <sup>e</sup>CAT: COPD Assessment Test. <sup>f</sup>VAS: visual analogue scale. <sup>g</sup>NEADL: Nottingham Extended Daily Activities Scale. <sup>h</sup>CNAQ: Council on Nutrition Appetite Questionnaire. <sup>i</sup>In all subjects at study entry and in a subcohort of 30 subjects during the first year. <sup>j</sup>In a subcohort of approximately 80 subjects. <sup>k</sup>In all subjects at study entry and within 72 hours of every exacerbation and in the subcohort of 30 subjects providing nasopharyngeal swabs during the first year of the study

### *Clinical assessments*

Quantitative high-resolution computed tomography scans are performed at enrolment and study conclusion to describe the degree of bronchiectasis and emphysema noted and to exclude other acute or evolving lung pathologies besides COPD and sequelae of COPD. A physical examination is performed at all visits. Medical history, smoking status and details of medication use are updated monthly. Influenza and pneumococcal vaccination status is updated annually.

Lung function testing is performed using spirometry, body plethysmography (lung volumes, body box) and single breath diffusion (gas transfer, TLCO) at specified visits. The following outcomes are recorded: spirometry, FEV<sub>1</sub>, FVC, FEV<sub>1</sub>/FVC ratio, FEV<sub>1</sub> % predicted, mid expiratory flow between 25 and 75% of the forced vital capacity (MEF<sub>25-75</sub>), single breath diffusion (transfer factor [TLCO] and rate of carbon monoxide uptake [KCO]), and body plethysmography (total lung capacity [TLC], residual volume [RV], vital capacity [VC] and RV/TLC). At the enrolment visit, subjects are asked to refrain from using short-acting bronchodilators for at least 6 hours and long-acting bronchodilators for at least 12 hours before key procedures. Prior to the subsequent follow-up visits, subjects may use their usual medication normally. Lung function measurements are performed under controlled conditions and in the sitting position as per standard practice.

Anthropometrics (including but not restricted to height, weight, waist and mid-arm circumference and triceps skin-fold circumference) are measured quarterly. Grip strength and fatigability are measured using standard techniques. Anthropometric data are used to compute the Malnutrition Universal Screening Tool (MUST) score.<sup>30</sup>

1  
2  
3 Nutritional information (including planned/ unplanned weight loss, and history and  
4 changes in food intake patterns) is collected quarterly according to MUST guidelines.  
5  
6

7  
8 A postero-anterior chest X-ray (and lateral if required) is performed at all  
9 exacerbation visits, as per standard clinical practice, in order to exclude pneumonia.  
10  
11

### 12 *Questionnaires and patient-reported outcome instruments*

13  
14 Various outcomes are assessed quarterly and at exacerbation using a series of  
15 questionnaires and patient-reported outcome instruments such as the COPD  
16 Assessment Test (CAT),<sup>31</sup> the Nottingham Extended Daily Activities Scale  
17 (NEADL),<sup>32</sup> the Council on Nutrition Appetite Questionnaire (CNAQ),<sup>33</sup> and the EQ-  
18 5D.<sup>34</sup> The five items included in the EQ-5D index are mobility, self-care, usual  
19 activities, pain/discomfort and anxiety/depression. The BODE index (Body-Mass  
20 Index, Degree of Airflow Obstruction, Level of Functional Dyspnea, Exercise  
21 Capacity)<sup>35</sup> will also be calculated.  
22  
23  
24  
25  
26  
27  
28  
29  
30  
31  
32

33  
34 Healthcare use is recorded at all visits, including medication, vaccination,  
35 oxygen therapy, use of mechanical ventilation, pulmonary rehabilitation treatment,  
36 surgical intervention, outpatient visits (including GP visits and telephone contacts to  
37 COPD team), emergency room visits, hospitalisations, and productivity loss (time  
38 missed from work or usual activities due to worsening of COPD symptoms). Potential  
39 changes in disease management following an exacerbation (e.g. change in medication  
40 use) are also recorded.  
41  
42  
43  
44  
45  
46  
47  
48

### 49 *Biological specimen collection*

50  
51 A wide range of biological specimens are collected from study participants (**table 3**).  
52  
53 Blood samples are collected from all patients at study entry, quarterly and at  
54 exacerbation. Sputum samples are obtained by spontaneous expectoration or induced  
55  
56  
57  
58  
59  
60

1  
2  
3 by stimulation according to standard methods from all patients at study entry, monthly  
4 and at exacerbation. Nasopharyngeal swabs are collected from all patients at study  
5 entry and then from a subcohort of 30 patients at monthly follow-up visits and at  
6 exacerbation during the first year of follow-up. Urine samples are collected from all  
7 patients at study entry and at exacerbation and from the subcohort of 30 patients at  
8 monthly follow-up visits during the first year. Breath samples are collected from  
9 approximately 80 patients (including the subcohort of 30 patients providing  
10 nasopharyngeal swabs) at monthly follow-up visits and at exacerbation visits during  
11 the first year.  
12  
13  
14  
15  
16  
17  
18  
19  
20  
21  
22

23 Blood samples are analysed for disease-related biomarkers, biochemistry, cell-  
24 mediated immune response, RNA profile and nutrients. Sputum samples are  
25 processed by traditional culture techniques and multiplex PCR analysis for  
26 identification of potential respiratory pathogens (including, but not limited to, non-  
27 typeable *H. influenzae*, *M. catarrhalis*, *S. pneumoniae*, *P. aeruginosa*, *Staphylococcus*  
28 *aureus*, respiratory syncytial virus, parainfluenza virus, rhinovirus, human  
29 metapneumovirus, influenza virus, adenovirus, and coronavirus). Sputum samples  
30 may also be analysed for disease-related biomarkers. Nasopharyngeal swabs are  
31 processed by traditional culture techniques and multiplex PCR analysis for potential  
32 pathogen identification. Urine samples may be processed for disease-related  
33 biomarkers. Breath samples are analysed by the selected ion flow tube mass  
34 spectrometry for identification of volatile organic compounds that may be  
35 characteristic for AECOPD.  
36  
37  
38  
39  
40  
41  
42  
43  
44  
45  
46  
47  
48  
49  
50  
51

52 Laboratory assays are performed at the Public Health Laboratory of Public Health  
53 England at University Hospital Southampton Foundation NHS Trust, GSK Vaccines  
54 central laboratory, and other GSK Vaccines designated laboratories. The assays use  
55  
56  
57  
58  
59  
60



1  
2  
3 standardised and validated procedures. Aliquots of all biological samples are  
4  
5 processed (if applicable), frozen and stored for possible further disease-related testing.  
6  
7 Culture isolates are also stored. Any additional laboratory tests will be performed at a  
8  
9 GSK designated laboratory.  
10

### 11 **Sample size calculation**

12  
13  
14  
15 The sample size calculation was based on the primary study endpoint of incidence of  
16  
17 all-cause AECOPD. Assuming that, on average, each subject is observed for a period  
18  
19 of 18 months and that 2 episodes of AECOPD can be expected per subject per year, if  
20  
21 120 subjects are followed, the number of total person-years would be around 180 and  
22  
23 during this time around 360 exacerbation events would be detected. If the distribution  
24  
25 of events per subject follows a Poisson distribution with no overdispersion, an  
26  
27 overdispersion factor of 1.5, or an overdispersion of 2, the approximate values of the  
28  
29 lower and upper bounds of the 95% confidence interval (CI) around the point estimate  
30  
31 of 2 events per subject per year would be 1.8-2.2, 1.7-2.3, and 1.7-2.3, respectively.  
32  
33 So a sample size of 120 subjects should ensure sufficient precision in the estimation  
34  
35 of the incidence rate of all-cause AECOPDs.  
36  
37  
38  
39

40 Additionally, in order to follow effectively 120 subjects, given the fact that  
41  
42 subjects may be eligible but withdraw quite early in the study possibly due to the  
43  
44 deterioration of the subject's health, the decision was taken to replace subjects who  
45  
46 withdrew during the first year of follow-up, and recruit additional subjects.  
47  
48

49 We will construct a CONSORT diagram and capture where possible reasons for  
50  
51 screen failure, drop-outs and loss to follow-up.  
52  
53  
54  
55  
56  
57  
58  
59  
60

## Data analysis

The co-primary study endpoints are the occurrence of all-cause AECOPD and the occurrence of AECOPD having sputum containing bacterial pathogens as detected by culture (overall and by species). The proportion of subjects at each visit for whom a sputum sample was obtained will be computed; overall and by the method the samples were obtained (spontaneous or induced). The proportion of sputum samples obtained at each visit and positive for specific bacterial pathogens (overall and by bacterial species) will also be calculated. The incidence rate of all-cause AECOPD and of AECOPD having sputum containing bacterial pathogens (overall and by bacterial species) will be calculated, with 95% CI. The 95% CI of the incidence rate will be computed using a model which accounts for repeated events, namely the generalised linear model assuming a negative binomial distribution for the response variable with logarithm as link function, and the logarithm of time for follow-up as an offset variable as a preliminary approach. Other flexible approaches to statistical analysis may also be used. In addition, the same model with covariates (e.g. smoking status at enrolment, number of moderate/severe exacerbations reported in the 12 months prior to enrolment, presence of respiratory pathogenic bacteria detected at the exacerbation visit and at previous visits) will be applied. Incidence rates will also be calculated for moderate AECOPD and for severe AECOPD.

## ETHICS AND DISSEMINATION

The AERIS study is conducted in accordance with the Declaration of Helsinki and Good Clinical Practice guidelines, and has been approved by the relevant institutional ethics and review board. All subjects must provide written informed consent to participate.

1  
2  
3 AERIS is being conducted in a specialised hospital that has extensive experience  
4 in respiratory research. AECOPD are proactively identified through patient-completed  
5 electronic diaries. After confirmation by phone, symptoms of an exacerbation trigger  
6 a clinic visit within 72 hours of symptom onset to enable comparisons of samples  
7 from same patient in stable COPD and during AECOPD. Although this is an intensive  
8 study with prolonged follow up, patients are expected to benefit from the improved  
9 access to expert care.  
10  
11  
12  
13  
14  
15  
16  
17

18  
19 The results obtained will be disseminated by presentations at international  
20 medical conferences and peer-reviewed publications. Reporting will be in accordance  
21 with STROBE guidance.  
22  
23  
24

## 25 26 **DISCUSSION**

27  
28  
29 The AERIS study has been initiated to comprehensively assess the role of infectious  
30 pathogens in AECOPD in a well-characterised cohort of patients. The study aims to  
31 explore the dynamics of airway infection and its possible contribution to AECOPD, as  
32 well as the potential role of chronic colonization in stable disease. The overall  
33 objective of the study will aim at refining the case definition of AECOPD to reflect  
34 the possible microbiological aetiology of exacerbations. This is of note, since there is  
35 currently no commonly agreed definition of AECOPD and no current case definition  
36 includes a microbiological endpoint. The impact of AECOPD on health-related  
37 quality-of-life and healthcare use will be assessed in order to provide a complete  
38 picture of disease burden. The interaction between airway infection and systemic  
39 manifestations of COPD and nutritional status will also be assessed in detail for the  
40 first time. Biological specimens collected during the study may also be used for  
41 further disease-related testing, including molecular typing to describe and compare  
42  
43  
44  
45  
46  
47  
48  
49  
50  
51  
52  
53  
54  
55  
56  
57  
58  
59  
60

1  
2  
3 selected biomarkers in AECOPD and stable COPD, to explore cell-mediated immune  
4  
5 response to specific bacterial antigens, and to develop non-invasive bacterial  
6  
7 diagnostic methods.  
8  
9

10 To our knowledge, few other studies have employed real-time electronic tracking  
11  
12 of symptoms to identify AECOPD and potential aetiological triggers. This is  
13  
14 important since available data suggest that up to 50% of exacerbations may not be  
15  
16 reported to healthcare providers and consequently exacerbation rates are lower in  
17  
18 studies employing event-based criteria to define AECOPD.<sup>36</sup> Due to the close daily  
19  
20 monitoring of symptoms to identify AECOPD, we anticipate that the exacerbation  
21  
22 rate in this study will be higher than previously reported. This close monitoring and  
23  
24 early therapeutic intervention at exacerbation may also impact on estimates of the  
25  
26 overall burden of disease.  
27  
28  
29

30 A number of other epidemiological studies have been initiated in recent years to  
31  
32 further characterize our understanding of the natural history of AECOPD. However, it  
33  
34 is important to recognise that most of these studies have not included molecular  
35  
36 microbiological assessments. Recent large observational studies focusing on  
37  
38 biomarker discovery have involved close phenotyping of COPD patients, but have not  
39  
40 studied the aetiology of exacerbations in depth.<sup>37-39</sup> In another study, potentially  
41  
42 pathogenic bacterial strains were identified using molecular typing techniques,  
43  
44 although viruses as potential airway pathogens were not investigated.<sup>21</sup> More recently,  
45  
46 the prevalence and load of airway bacteria in stable and exacerbated AECOPD have  
47  
48 been assessed in paired samples from 52 patients participating in the London COPD  
49  
50 cohort study using modern molecular techniques.<sup>19</sup> Airway bacterial prevalence and  
51  
52 load was found to increase significantly during AECOPD, with quantitative molecular  
53  
54 techniques proving more discriminatory than culture. However, assessment was  
55  
56  
57  
58  
59  
60

1  
2  
3 limited to only the three most commonly detected airway bacteria (*H. influenzae*, *S.*  
4 *pneumoniae*, and *M. catarrhalis*). However, other potential pathogens and the overall  
5 respiratory microbiome may also contribute and have not yet been studied in  
6 detail.<sup>17,18,20,40,41</sup> In AERIS, samples will be acquired during both AECOPD and stable  
7 disease and analysed for a wide range of potentially pathogenic bacteria and viruses  
8 using advanced PCR-based techniques as well as traditional culture-based methods.  
9  
10  
11  
12  
13  
14  
15

16  
17 A major strength of the AERIS study design is the comprehensive assessment of  
18 clinical status, microbiology, functional status, nutritional status, health-related  
19 quality-of-life and healthcare resource utilisation in individual patients in a single  
20 large cohort during both stable COPD and AECOPD. The selection of subjects with a  
21 history of at least a single exacerbation enriches the cohort to some degree and  
22 ensures an adequate number of exacerbations are sampled. It is accepted that some  
23 aspects of the analysis may not be generalizable to the subgroup of patients who never  
24 exacerbate. The analyses proposed in this study will generate epidemiological data to  
25 complement that derived from existing COPD cohorts and further explore  
26 determinants of COPD and the contribution of bacterial and viral pathogens to  
27 AECOPD, as well as to provide some understanding of the limitations of existing  
28 data. As exacerbation visits are triggered by patient diary data, accurate and timely  
29 diary completion is essential. All subjects participating in this study receive diary  
30 training at enrolment and support is available from the study team at all times to  
31 promote accurate and complete diary keeping. Cohort retention is a key factor in the  
32 successful delivery of such a study and with in-depth sampling protocols, participant  
33 engagement, comfort and feedback are key factors in optimising cohort retention and  
34 comprehensive data collection.  
35  
36  
37  
38  
39  
40  
41  
42  
43  
44  
45  
46  
47  
48  
49  
50  
51  
52  
53  
54  
55  
56  
57  
58  
59  
60

1  
2  
3 Identification of novel approaches for the prevention of AECOPD is an important  
4 research goal. Long-acting beta-agonists (LABA) and long-acting anti-muscarinic  
5 bronchodilators remain the cornerstone of treatment for patients with COPD.<sup>42</sup>  
6  
7 Combinations of LABA and inhaled corticosteroids are also used in patients with  
8 more severe disease and/or frequent exacerbations. Long-term treatment with  
9 macrolide antibiotics and pulsed quinolone therapy may be considered for  
10 exacerbation prevention.<sup>7,43,44</sup> However, concerns exist about the potential for  
11 development of antimicrobial resistance during long-term antibiotic therapy.  
12  
13 Numerous other approaches are under investigation for the prevention of AECOPD,  
14 including anti-inflammatory drugs, immunomodulatory agents, immunotherapy,  
15 antioxidants and non-pharmacologic strategies. Vaccination is another potential  
16 approach meriting investigation for reducing AECOPD risk. However, optimal  
17 strategies targeting key respiratory pathogens are not yet available to the clinician.  
18  
19  
20  
21  
22  
23  
24  
25  
26  
27  
28  
29  
30  
31

32 In conclusion, there have been considerable advances in our understanding of the  
33 epidemiology, pathophysiology and clinical management of COPD in recent years.  
34 However, there remains a genuine need to further explore the aetiology and  
35 pathogenesis of AECOPD. It is anticipated that results of this epidemiological study  
36 will increase our understanding of the contribution of bacterial and viral pathogens to  
37 AECOPD, the natural history of these events in association with the timing of  
38 symptoms and physiological changes, and will offer new direction for research into  
39 targeted therapeutic and preventative interventions.  
40  
41  
42  
43  
44  
45  
46  
47  
48  
49  
50  
51  
52  
53  
54  
55  
56  
57  
58  
59  
60

1  
2  
3 **Acknowledgments** We wish to thank the COPD patients and their carers who are  
4 participating in this study. We also wish to acknowledge the support of the  
5 Southampton National Institute for Health Research (NIHR) Wellcome Trust Clinical  
6 Research Facility (CRF) the Southampton NIHR Biomedical Research Centre (BRC)  
7 and the NIHR Southampton Respiratory Biomedical Research Unit (RBRU). The  
8 CRF, BRC and RBRU are funded by NIHR and are a partnership between the  
9 University of Southampton and University Hospital Southampton NHS Foundation  
10 Trust (UHS). We also acknowledge Kerry Gove (University of Southampton) for lung  
11 function measurements, Dr Tony Williams (University of Southampton) for cell-  
12 mediated immunity sample capture, Dr Steve Wootton and Kesta Durkin (UHS) for  
13 nutritional assessments, Dr Stephen Harden (UHS) for supervision of CT scanning  
14 and Sister Lindsay Welch (UHS) for leading the nursing team. We thank local patient  
15 groups, including the British Lung Foundation Breathe Easy groups, for their  
16 continued support. The authors would also like to acknowledge the GSK Vaccines  
17 study team: Sylvia Taylor (epidemiology team), Pascale Lallemand and Rosalia  
18 Calamera (data management), Marcela Gavigan (clinical operations), Seona  
19 McGregor and Rebecca White (local support), Silvia Damaso and Maxim Blum  
20 (statistical support), Peter Vink (input in the design) and Marie-Josée Uwamahoro.  
21 We also thank Jennifer Coward (independent writer on behalf of GSK Vaccines) for  
22 scientific writing support and Wouter Houthoofd (XPE Pharma and Science, on  
23 behalf of GSK Vaccines) for publication coordination.

24  
25  
26  
27  
28  
29  
30  
31  
32  
33  
34  
35  
36  
37  
38  
39  
40  
41  
42  
43  
44  
45  
46  
47  
48  
49  
50  
51  
52  
53 **Funding** GlaxoSmithKline Biologicals SA funded this study and paid for all costs  
54 associated with the development and publishing of the present manuscript.  
55  
56  
57  
58  
59  
60

1  
2  
3  
4  
5  
6 **Contributors S. Bourne:** principle investigator, closely involved in all steps of the  
7 study and specifically wrote substantial parts of the protocol;  
8

9  
10  
11 **C. Cohet:** epidemiologist responsible for this observational study was closely  
12 involved in the design of study;  
13

14  
15 **V. Kim and A. Barton:** co-investigators and closely involved in the conduct of this  
16 study;  
17  
18

19  
20 **A. Tuck:** site project manager for microbiology testing and involved in writing of  
21 microbiology parts of the protocol;  
22  
23

24  
25 **E. Aris:** project statistician, responsible for writing of statistical analysis plan and  
26 definition of statistical outcomes;  
27  
28

29  
30 **S. Mesia Vela:** project manager, closely involved in the discussion on design and  
31 follow-up of the study;  
32  
33

34  
35 **J-M. Devaster:** director of clinical research and translational science, closely  
36 involved in all discussions and study accountable person;  
37  
38

39  
40 **W.R. Ballou:** vice-president of clinical research and translational science team,  
41 closely involved in all discussions of design of this study.  
42  
43

44  
45 **S. Clarke:** co-investigator, closely involved in all steps of the study.  
46  
47

48 **T. Wilkinson:** coordinating lead investigator, involved in all steps of the study.  
49

50 All authors provided intellectual input into the development of this manuscript. And  
51 have critically reviewed and approved the final manuscript.  
52  
53

54  
55 **Competing Interests** S. Bourne, V. Kim, A. Barton, A. Tuck, S. Clarke and T.  
56 Wilkinson received an institutional grant from GlaxoSmithKline (GSK) group of  
57  
58  
59



1  
2  
3 companies to conduct this study. S. Bourne reports receiving grants, advisory board  
4 fees and assistance in attending conferences from GSK. He has also received fees for  
5 lecturing, advisory boards and teaching from Novartis, Astra Zeneca and Boehringer  
6  
7  
8  
9  
10  
11  
12  
13  
14  
15  
16  
17  
18  
19  
20  
21  
22  
23  
24  
25  
26  
27  
28  
29  
30  
31  
32  
33  
34  
35  
36  
37  
38  
39  
40  
41  
42  
43  
44  
45  
46  
47  
48  
49  
50  
51  
52  
53  
54  
55  
56  
57  
58  
59  
60

Ingelheim. S. Clarke has also received project grant support, conference funding attendance and advisory board payments from Pfizer, GSK and Novartis (all payments were made to employing institution). T. Wilkinson has also received travel expenses, fees for advisory boards GSK related to this study, fees for advisory boards from Pfizer and AstraZeneca, reimbursement for travel and conference attendance from Boehringer Ingelheim, consultancy fees from Almirall, and financial support from Novartis and Retroscreen (travel expenses, consultancy and project support costs). C. Cohet, E. Aris, S. Mesia Vela, J-M. Devaster and W.R. Ballou are employed by GSK; C. Cohet, E. Aris, J-M Devaster and W.R. Ballou also report GSK stock options.

## REFERENCES

1. Decramer M, Janssens W, Miravittles M. Chronic obstructive pulmonary disease. *Lancet* 2012;379:1341–51.
2. Bousquet J, Kiley J, Bateman ED, et al. Prioritized research agenda for prevention and control of chronic respiratory diseases. *Eur Respir J* 2010;36:995–1001.
3. Lozano R, Naghavi M, Foreman K, et al. Global and regional mortality from 235 causes of death for 20 age groups in 1990 and 2010: a systemic analysis for the Global Burden of Disease Study 2010. *Lancet* 2012;380:2095–128.
4. Vos T, Flaxman AD, Lozano R, et al. Years lived with disability (YLDs) for 1160 sequelae of 289 diseases and injuries 1990–2010: a systemic analysis for the Global Burden of Disease Study 2010. *Lancet* 2012;380:2163–96.
5. Murray CJ, Vos T, Lozano R, et al. Disability-adjusted life years (DALYs) for 291 diseases and injuries in 21 regions, 1990–2010: a systemic analysis for the Global Burden of Disease Study 2010. *Lancet* 2012;380: 2197–223.
6. Loddenkemper R, Gibson GJ, Sibbille Y. European Respiratory Society/European Lung Foundation. *European Lung White Book. The First Comprehensive Survey on Respiratory Health in Europe*. Sheffield, England: European Respiratory Society Journals Ltd, 2003.
7. Seemungal TA, Wilkinson TM, Hurst JR, et al. Long-term erythromycin therapy is associated with decreased chronic obstructive pulmonary disease exacerbations. *Am J Respir Crit Care Med* 2008;178:1139–47.

- 1  
2  
3 8. Donaldson GC, Seemungal TA, Bhowmik A, Wedzicha JA. Relationship  
4 between exacerbation frequency and lung function decline in chronic obstructive  
5 pulmonary disease. *Thorax* 2002;57:847–52.  
6  
7
- 8  
9  
10 9. Miravittles M, Ferrer M, Pont A, et al. Effect of exacerbations on quality of life  
11 in patients with chronic obstructive pulmonary disease: a 2 year follow up study.  
12 *Thorax* 2004;59:387–95.  
13  
14
- 15  
16  
17 10. Soler-Cataluña JJ, Martínez-García MA, Román Sánchez P, et al. Severe acute  
18 exacerbations and mortality in patients with chronic obstructive pulmonary  
19 disease. *Thorax* 2005;60:925–31.  
20  
21
- 22  
23  
24 11. Nishimura K, Sato S, Tsukino M, et al. Effect of exacerbations on health status in  
25 subjects with chronic obstructive pulmonary disease. *Health Qual Life Outcomes*  
26 2009;7:69.  
27  
28
- 29  
30  
31 12. Sullivan SD, Ramsey SD, Lee TA. The economic burden of COPD. *Chest*  
32 2000;117(2 Suppl):5S–9S.  
33  
34
- 35  
36  
37 13. Hurst JR, Vestbo J, Anzueto A, et al. Susceptibility to exacerbation in chronic  
38 obstructive pulmonary disease. *N Engl J Med* 2010;363:1128–38.  
39  
40
- 41  
42  
43 14. Papi A, Bellettato CM, Braccioni F, et al. Infections and airway inflammation in  
44 chronic obstructive pulmonary disease severe exacerbations. *Am J Respir Crit*  
45 *Care Med* 2006;173:1114–21.  
46  
47
- 48  
49  
50 15. Sethi S, Murphy TF. Infection in the pathogenesis and course of chronic  
51 obstructive pulmonary disease. *N Engl J Med* 2008;359:2355–65.  
52  
53
- 54  
55  
56 16. Hilty M, Burke C, Pedro H, et al. Disordered microbial communities in asthmatic  
57 airways. *PLoS One* 2010;5:e8578.  
58  
59  
60

- 1  
2  
3 17. Huang YJ, Kim E, Cox MJ, et al. A persistent and diverse airway microbiota  
4 present during chronic obstructive pulmonary disease exacerbations.  
5  
6 *OMICS* 2010;14:9–59.  
7  
8
- 9  
10 18. Erb-Downward JR, Thompson DL, Han MK, et al. Analysis of the lung  
11 microbiome in the "healthy" smoker and in COPD. *PLoS One* 2011;6:e16384.  
12  
13
- 14 19. Garcha DS, Thurston SJ, Patel AR, et al. Changes in prevalence and load of  
15 airway bacteria using quantitative PCR in stable and exacerbated COPD. *Thorax*  
16 2012;67:1075–80.  
17  
18
- 19 20. Pragman AA, Kim HB, Reilly CS, et al. The lung microbiome in moderate and  
20 severe chronic obstructive pulmonary disease. *PLoS One* 2012;7:e47305.  
21  
22
- 23 21. Sethi S, Evans N, Grant BJ, Murphy TF. New strains of bacteria and  
24 exacerbations of chronic obstructive pulmonary disease. *N Engl J Med*  
25 2002;347:465–71.  
26  
27
- 28 22. Rosell A, Monsó E, Soler N, et al. Microbiologic determinants of exacerbation in  
29 chronic obstructive pulmonary disease. *Arch Intern Med* 2005;165:891–97.  
30  
31
- 32 23. Patel IS, Seemungal TA, Wilks M, et al. Relationship between bacterial  
33 colonisation and the frequency, character, and severity of COPD exacerbations.  
34 *Thorax* 2002;57:759–64.  
35  
36
- 37 24. Wilkinson TM, Patel IS, Wilks M, et al. Airway bacterial load and FEV1 decline  
38 in patients with chronic obstructive pulmonary disease. *Am J Respir Crit Care*  
39 *Med* 2003;167:1090–5.  
40  
41
- 42 25. Marin A, Garcia-Aymerich J, Sauleda J, et al. Effect of bronchial colonisation on  
43 airway and systemic inflammation in stable COPD. *COPD* 2012;9:121–30.  
44  
45  
46  
47  
48  
49  
50  
51  
52  
53  
54  
55  
56  
57  
58  
59  
60

- 1  
2  
3 26. Sethi S, Sethi R, Eschberger K, et al. Airway bacterial concentrations and  
4 exacerbations of chronic obstructive pulmonary disease. *Am J Respir Crit Care*  
5 *Med* 2007;176:356–61.  
6  
7  
8  
9  
10 27. Global Initiative for Chronic Obstructive Lung Disease, Inc. Global strategy for  
11 the diagnosis, management, and prevention of COPD (Revised 2011).  
12 [http://www.goldcopd.org/uploads/users/files/GOLD\\_Report\\_2011\\_Feb21.pdf](http://www.goldcopd.org/uploads/users/files/GOLD_Report_2011_Feb21.pdf)  
13 (accessed 12 Feb 2014).  
14  
15  
16  
17  
18  
19 28. Anthonisen NR, Manfreda J, Warren CP, et al. Antibiotic therapy in  
20 exacerbations of chronic obstructive pulmonary disease. *Ann Intern Med*  
21 1987;106:196–204.  
22  
23  
24  
25  
26  
27 29. Wilkinson TM, Donaldson GC, Hurst JR, et al. Early therapy improves outcomes  
28 of exacerbations of chronic obstructive pulmonary disease. *Am J Respir Crit Care*  
29 *Med* 2004;169:1298–1303.  
30  
31  
32  
33  
34 30. BAPEN. The MUST toolkit. [http://www.bapen.org.uk/screening-for-](http://www.bapen.org.uk/screening-for-malnutrition/must/must-toolkit/the-must-itself)  
35 [malnutrition/must/must-toolkit/the-must-itself](http://www.bapen.org.uk/screening-for-malnutrition/must/must-toolkit/the-must-itself) (accessed 12 Feb 2014).  
36  
37  
38  
39 31. Jones PW, Brusselle G, Dal Negro RW, et al. Properties of the COPD assessment  
40 test in a cross-sectional European study. *Eur Respir J* 2011;38:29–35.  
41  
42  
43  
44 32. Nouri FM, Lincoln NB. An extended activities of daily living scale for stroke  
45 patients. *Clinical Rehab* 1987;1:301–5.  
46  
47  
48  
49 33. Wilson MM, Thomas DR, Rubenstein LZ, et al. Appetite assessment: simple  
50 appetite questionnaire predicts weight loss in community-dwelling adults and  
51 nursing home residents. *Am J Clin Nutr* 2005;82:1074–81.  
52  
53  
54  
55  
56  
57  
58  
59  
60

- 1  
2  
3 34. The EuroQol Group. EuroQol – a new facility for the measurement of health-  
4 related quality of life. *Health Policy* 1990;16:199–208.  
5  
6  
7  
8 35. Celli BR, Cote CG, Marin JM, et al. The body-mass index, airflow obstruction,  
9 dyspnea, and exercise capacity index in chronic obstructive pulmonary disease. *N*  
10 *Engl J Med* 2004;350:1005–12.  
11  
12  
13  
14  
15 36. Hurst JR, Wedzicha JA. An introduction to conducting COPD exacerbation  
16 research. *Respir Med: COPD Update* 2009;5:38–44.  
17  
18  
19  
20 37. Vestbo J, Anderson W, Coxson HO, et al. Evaluation of COPD longitudinally to  
21 identify predictive surrogate end-points (ECLIPSE). *Eur Respir J* 2008;31:869–  
22 73.  
23  
24  
25  
26  
27 38. Regan EA, Hokanson JE, Murphy JR, et al. Genetic epidemiology of COPD  
28 (COPDGene) study design. *COPD* 2010;7:32–43.  
29  
30  
31  
32 39. Woodruff PG. Novel outcomes and end points: biomarkers in chronic obstructive  
33 pulmonary disease clinical trials. *Proc Am Thorac Soc* 2011; 8:350–5.  
34  
35  
36  
37 40. Beasley V, Joshi PV, Singanayagam A, et al. Lung microbiology and  
38 exacerbations in COPD. *Int J Chron Obstruct Pulmon Dis* 2012;7:555–69.  
39  
40  
41  
42 41. Mackay AJ, Hurst JR. COPD exacerbations: causes, prevention, and treatment.  
43 *Med Clin North Am* 2012;96:789–809.  
44  
45  
46  
47 42. Global Initiative for Chronic Obstructive Lung Disease, Inc. Global strategy for  
48 the diagnosis, management, and prevention of COPD (Updated 2013).  
49 [http://www.goldcopd.org/uploads/users/files/GOLD\\_Report\\_2013\\_Feb20.pdf](http://www.goldcopd.org/uploads/users/files/GOLD_Report_2013_Feb20.pdf)  
50  
51  
52 (accessed 12 Feb 2014).  
53  
54  
55  
56  
57  
58  
59  
60

- 1  
2  
3 43. Sethi S, Jones PW, Theron MS, et al. Pulsed moxifloxacin for the prevention of  
4  
5 exacerbations of chronic obstructive pulmonary disease: a randomized controlled  
6  
7 trial. *Respir Res* 2010;11:10.  
8  
9  
10 44. Albert RK, Connett J, Bailey WC, et al. Azithromycin for prevention of  
11  
12 exacerbations of COPD. *N Engl J Med* 2011;365:689–98.  
13  
14  
15  
16  
17  
18  
19  
20  
21  
22  
23  
24  
25  
26  
27  
28  
29  
30  
31  
32  
33  
34  
35  
36  
37  
38  
39  
40  
41  
42  
43  
44  
45  
46  
47  
48  
49  
50  
51  
52  
53  
54  
55  
56  
57  
58  
59  
60

For peer review only

1  
2  
3  
4  
5  
6  
7  
8  
9  
10  
11  
12  
13  
14  
15  
16  
17  
18  
19  
20  
21  
22  
23  
24  
25  
26  
27  
28  
29  
30  
31  
32  
33  
34  
35  
36  
37  
38  
39  
40  
41  
42  
43  
44  
45  
46  
47  
48  
49  
50  
51  
52  
53  
54  
55  
56  
57  
58  
59  
60

# Acute Exacerbation and Respiratory InfectionS in COPD (AERIS): **protocol for** a prospective, observational cohort study

Simon Bourne,<sup>1</sup> Catherine Cohet,<sup>2</sup> Viktoriya Kim,<sup>1</sup> Anna Barton,<sup>1</sup> Andy Tuck,<sup>3</sup>  
Emmanuel Aris,<sup>2</sup> Sonia Mesia Vela,<sup>2</sup> Jeanne-Marie Devaster,<sup>2</sup> W Ripley Ballou,<sup>2</sup>  
Stuart Clarke,<sup>3,4</sup> Tom Wilkinson<sup>5,6</sup>

<sup>1</sup> Respiratory Medicine, University Hospitals Southampton NHS Foundation Trust,  
Southampton, UK

<sup>2</sup> GlaxoSmithKline Vaccines, Rixensart, Belgium

<sup>3</sup> Infectious Disease Epidemiology Group, Sir Henry Wellcome Laboratories,  
Academic Unit of Clinical and Experimental Sciences, Faculty of Medicine,  
University of Southampton, Southampton, UK

<sup>4</sup> Public Health England, Southampton, UK

<sup>5</sup> Academic Unit of Clinical and Experimental Sciences, Faculty of Medicine,  
University of Southampton, Southampton, UK

<sup>6</sup> Southampton NIHR Respiratory Biomedical Research Unit, University Hospital  
Southampton Foundation NHS Trust, Southampton, UK



**Correspondence to**

Dr Tom Wilkinson MA MRCP PhD

Southampton General Hospital

Mailpoint 810, Level F, South Block

Southampton SO16 6YD

United Kingdom

Tel: +442380 795341

Email: [T.Wilkinson@soton.ac.uk](mailto:T.Wilkinson@soton.ac.uk)

**Author emails:**

Simon Bourne: [simon@soton.ac.uk](mailto:simon@soton.ac.uk)

Catherine Cohet: [CATHERINE.X.COHET@GSK.COM](mailto:CATHERINE.X.COHET@GSK.COM)

Viktoriya Kim: [v.kim@soton.ac.uk](mailto:v.kim@soton.ac.uk)

Anna Barton: [a.barton@soton.ac.uk](mailto:a.barton@soton.ac.uk)

Andy Tuck: [A.C.Tuck@soton.ac.uk](mailto:A.C.Tuck@soton.ac.uk)

Emmanuel Aris: [EMMANUEL.X.ARIS@GSK.COM](mailto:EMMANUEL.X.ARIS@GSK.COM)

Sonia Mesia Vela : [SONIA.X.MESIA-VELA@GSK.COM](mailto:SONIA.X.MESIA-VELA@GSK.COM)

Jeanne-Marie Devaster : [JEANNE-MARIE.DEVASTER@GSK.COM](mailto:JEANNE-MARIE.DEVASTER@GSK.COM)

W Ripley Ballou: [RIPLEY.W.BALLOU@GSK.COM](mailto:RIPLEY.W.BALLOU@GSK.COM)

Stuart Clarke: [S.C.Clarke@soton.ac.uk](mailto:S.C.Clarke@soton.ac.uk)

Tom Wilkinson: [T.Wilkinson@soton.ac.uk](mailto:T.Wilkinson@soton.ac.uk)

**Key words** Chronic obstructive pulmonary disease, acute exacerbation, respiratory infection, epidemiology

**Word count (excluding title page, abstract, references, figures/tables)** 3210

## ARTICLE SUMMARY

### Article focus

- Acute Exacerbation and Respiratory InfectionS in COPD (AERIS) is a prospective longitudinal epidemiological study initiated in the UK to assess how dynamic changes in the COPD airway microbiome contribute to the incidence and severity of acute exacerbations of COPD (AECOPD).

### Key messages

- There remains a genuine need to further explore the aetiology and pathogenesis of AECOPD.
- It is anticipated that results of this study will increase our understanding of the contribution of bacterial and viral pathogens to AECOPD, potentially leading to research into targeted therapeutic and preventative interventions.

### Strengths and limitations of this study

- Conducted in a specialised hospital that has extensive experience in respiratory research.
- Comprehensive assessment of clinical status, microbiology, functional status, nutritional status, health-related quality-of-life and healthcare resource utilisation in individual patients in a single large cohort during both stable COPD and AECOPD
- AECOPD are proactively identified through patient-completed electronic diaries.
- Cohort retention is a key factor in the successful delivery of such a study and with in-depth sampling protocols, participant engagement, comfort and feedback are key factors in optimising cohort retention and comprehensive data collection.

## ABSTRACT

**Introduction:** The aetiology of acute exacerbations of COPD remains incompletely understood and strategies for ~~the~~ treatment and prevention ~~of AECOPD~~ have not altered significantly for many years. Improved understanding of the role of respiratory pathogens in AECOPD is required and the use of modern molecular microbiological techniques may lead to insights into host-pathogen interactions and the development of more targeted therapeutic approaches.

**Methods and analyses:** Acute Exacerbation and Respiratory InfectionS in COPD (AERIS) is a ~~prospective~~ longitudinal epidemiological study initiated in the UK to assess how ~~dynamic~~ changes in the COPD airway microbiome contribute to the incidence and severity of AECOPD. COPD patients aged 40–85 ~~years~~ are followed monthly for 2 years, and seen in the clinic reviewed within 72 hours of onset of symptoms of AECOPD. Exacerbations are detected using daily electronic diary cards ~~that subjects complete daily~~. Blood, sputum, nasopharyngeal and urine samples are collected at pre-specified time-points. Molecular diagnostic and typing techniques are used to describe the dynamics of airway infection during AECOPD and stable disease, and its associations with clinical outcome. This study ~~also aims to~~ refine the case definition of AECOPD to reflect the possible microbiological aetiology of exacerbations. ~~The study~~ AERIS will ~~also~~ assess the impact of AECOPD on health-related quality-of-life and healthcare resource utilisation, as well as the possible interactions between nutritional status, infection and ~~cellular~~ immune responses.

**Ethics and dissemination:** AERIS is conducted in accordance with the Declaration of Helsinki and Good Clinical Practice-GCP guidelines, and has been approved by the ~~relevant~~ institutional ethics and review board. All subjects must provide written

1  
2  
3 informed consent. The results obtained will be disseminated ~~by presentations~~ at  
4 international medical conferences and in peer-reviewed publications.  
5  
6

7  
8 **Discussion:** ~~To our knowledge, f~~ew other studies have addressed the complexity of  
9 the microbiological and systemic components of COPD or employed real-time  
10 electronic tracking of symptoms to identify AECOPD and potential aetiological  
11 triggers. ~~It is anticipated that R~~esults of AERIS will significantly increase our  
12 understanding of the contribution of ~~bacterial and viral pathogens~~ pathogens to  
13 AECOPD, potentially leading to ~~research into~~ new targeted therapeutic and  
14 preventative interventions.  
15  
16  
17  
18  
19  
20  
21  
22  
23

24 **Registration:** ClinicalTrials.gov NCT01360398  
25  
26  
27  
28  
29  
30  
31  
32  
33  
34  
35  
36  
37  
38  
39  
40  
41  
42  
43  
44  
45  
46  
47  
48  
49  
50  
51  
52  
53  
54  
55  
56  
57  
58  
59  
60

## INTRODUCTION

Chronic obstructive pulmonary disease (COPD) is an inflammatory disease of the lung, characterised by progressive airflow limitation that is not fully reversible.<sup>1</sup> COPD is the most common chronic respiratory illness in older adults, affecting an estimated 210 million people worldwide.<sup>2</sup> This condition has a substantial impact on quality-of-life.<sup>2</sup> The Global Burden of Disease Study found COPD to be the third leading cause of death globally and the ninth leading cause of years of life lost due to premature mortality in 2010,<sup>3</sup> accounting for 3.7% of years lived with disability and 3.1% of disability-adjusted life years worldwide.<sup>4,5</sup> COPD also imposes a substantial socioeconomic burden. In 2001, the total cost of COPD in Europe was reported to be €38.7 billion.<sup>6</sup>

Considerable progress has been made concerning the epidemiology, pathophysiology and clinical management of COPD in recent years. However, significant challenges remain. Improved understanding of acute exacerbations of COPD (AECOPD) is a key research priority. AECOPD are highly relevant clinically, being a major cause of COPD-related morbidity and mortality,<sup>7-11</sup> as well as accounting for a substantial proportion of the significant social, healthcare and economic burden of COPD.<sup>6</sup> It has been estimated that AECOPD account for approximately 70% of total healthcare costs associated with COPD.<sup>12</sup> Patients with Global Initiative for Chronic Obstructive Lung Disease (GOLD) stage II or more disease experience 1 or 2 exacerbations annually. Exacerbation varies from patient to patient with severity of disease.<sup>13</sup> Various triggers for AECOPD have been identified;<sup>1</sup> however, up to 75% of all exacerbations are associated with the detection of bacterial and/or viral respiratory pathogens.<sup>14,15</sup> Exacerbations associated with detectable respiratory pathogens have been shown to have a more marked impact on

1  
2  
3 lung function and longer duration of hospitalisation than exacerbations of non-  
4  
5 infectious aetiology.<sup>14</sup>  
6  
7

8 With the introduction of new molecular sequencing techniques, the traditional  
9  
10 belief that healthy lungs are sterile has been refuted. There is increasing evidence that  
11  
12 the lower respiratory tract contains a diverse microbial flora that differs between  
13  
14 health and disease.<sup>16-20</sup> The presence of potentially pathogenic microorganisms in the  
15  
16 inflamed airways of patients with COPD is well-documented, with up to 50% of  
17  
18 patients with stable COPD showing evidence of lower airway bacterial colonisation  
19  
20 using traditional culture techniques.<sup>15,21,22</sup> In patients with COPD, bacterial detection  
21  
22 in lower airway derived samples is associated with increased airway inflammation,  
23  
24 reduced lung function and more frequent exacerbations.<sup>23-25</sup> Acquisition of new  
25  
26 pathogen strains also appears to be associated with an increased risk of  
27  
28 AECOPD.<sup>15,21,26</sup> Estimates of the relative contribution of different pathogens to  
29  
30 AECOPD vary. However, non-typeable *Haemophilus influenzae* appears to be the  
31  
32 major bacterial pathogen associated with AECOPD, followed by *Streptococcus*  
33  
34 *pneumoniae*, *Moraxella catarrhalis* and *Pseudomonas aeruginosa*.<sup>14,15</sup> Respiratory  
35  
36 viruses commonly associated with AECOPD are diverse and include human  
37  
38 rhinoviruses, influenza and parainfluenza viruses, respiratory syncytial virus,  
39  
40 coronavirus and adenovirus.<sup>15</sup>  
41  
42  
43  
44  
45

46 Improved understanding of the role of infectious pathogens in AECOPD is  
47  
48 required to better understand the pathophysiology of the disease and may lead to the  
49  
50 development of more targeted strategies for treatment and prevention. This paper  
51  
52 describes the objectives and design of Acute Exacerbation and Respiratory InfectionS  
53  
54 in COPD (AERIS), a prospective longitudinal epidemiological study initiated in the  
55  
56 UK to assess the role of respiratory infection in acute exacerbations of COPD.  
57  
58  
59  
60

Molecular diagnostic and typing techniques will be used to describe the dynamics of airway infection and its potential association with clinical outcome. The study will also assess the impact of AECOPD on health-related quality-of-life and healthcare resource utilisation, as well as the possible interaction between disease endotype and exacerbations.

## OBJECTIVES

The primary objective of the AERIS study is to estimate the incidence of all-cause AECOPD and of AECOPD with sputum containing bacterial pathogens (overall and by species). Secondary study objectives are summarised in **table 1**.

**Table 1** Overview of primary and secondary objectives of the AERIS study

| Level     | Objective                                                                                                                                                                                                                                                                                                                                                                                                                                                                                                                                                                                                                                                                                                                                                                                                                                                                                                                                                      |
|-----------|----------------------------------------------------------------------------------------------------------------------------------------------------------------------------------------------------------------------------------------------------------------------------------------------------------------------------------------------------------------------------------------------------------------------------------------------------------------------------------------------------------------------------------------------------------------------------------------------------------------------------------------------------------------------------------------------------------------------------------------------------------------------------------------------------------------------------------------------------------------------------------------------------------------------------------------------------------------|
| Primary   | <ul style="list-style-type: none"> <li>To estimate the incidence rate of all-cause AECOPD</li> <li>To estimate the incidence rate of AECOPD having sputum containing bacterial pathogens (overall and by species)</li> </ul>                                                                                                                                                                                                                                                                                                                                                                                                                                                                                                                                                                                                                                                                                                                                   |
| Secondary | <ul style="list-style-type: none"> <li>To describe the proportion of overall and specific bacterial pathogens detected in sputum by severity of AECOPD</li> <li>To describe the proportion of overall and specific bacterial pathogens detected in sputum in stable COPD</li> <li>To estimate the incidence rate of AECOPD having sputum containing viral pathogens (overall and by species)</li> <li>To describe the proportion of overall and specific viral pathogens detected in sputum by severity of AECOPD</li> <li>To estimate the time elapsed between consecutive AECOPD episodes</li> <li>To assess the impact of all-cause AECOPD and stable COPD on health-related quality-of-life</li> <li>To assess the impact on healthcare use: <ul style="list-style-type: none"> <li>Of all-cause AECOPD</li> <li>Of AECOPD having sputum containing bacterial pathogens</li> <li>Of AECOPD having sputum containing viral pathogens</li> </ul> </li> </ul> |

AECOPD, acute exacerbations of chronic obstructive pulmonary disease

## METHODS

### Study design

This is an ongoing, single-centre, prospective, observational cohort study based at University Hospital Southampton, UK.

### Study population

Male and female COPD patients between the age of 40 and 85 years are eligible for study participation provided they meet the following inclusion criteria: (i) a confirmed diagnosis of COPD with post-bronchodilator forced expiratory volume in one second ( $FEV_1$ )  $\leq 80\%$  of the predicted normal value and  $FEV_1$ /forced vital capacity (FVC)  $\leq 0.7$ , consistent with GOLD stage II–IV disease,<sup>27</sup> (ii) current or ex-smoker with smoking history  $\geq 10$  pack years, and (iii) 1 or more documented exacerbations of COPD treated with antibiotics and/or steroids in the 12 months prior to enrolment (table 2). Subjects with recent COPD exacerbations, in stable condition, and having stopped antibiotics, can be enrolled one month post-exacerbation. Exclusion criteria include other known respiratory conditions, such as asthma, as the only cause of the respiratory obstructive disorder,  $\alpha$ -1 antitrypsin deficiency, cystic fibrosis, tuberculosis, lung cancer, previous history of lung surgery and other conditions imposing pneumonia risk. Subjects on long-term corticosteroid or antibiotic therapy at the time of enrolment and those who have received antibiotics and/or steroids in the month prior to the enrolment are also excluded.



**Table 2** Study inclusion and exclusion criteria

|                    |                                                                                                                                                                                                                                                                                                                                                                                                                                                                                                                                                                                                                                                                                                                                                                                                                                                                                                                                                                                                                                                                                                                            |
|--------------------|----------------------------------------------------------------------------------------------------------------------------------------------------------------------------------------------------------------------------------------------------------------------------------------------------------------------------------------------------------------------------------------------------------------------------------------------------------------------------------------------------------------------------------------------------------------------------------------------------------------------------------------------------------------------------------------------------------------------------------------------------------------------------------------------------------------------------------------------------------------------------------------------------------------------------------------------------------------------------------------------------------------------------------------------------------------------------------------------------------------------------|
| Inclusion criteria | Subjects must satisfy <i>ALL</i> of the following criteria at study entry: <ul style="list-style-type: none"> <li>• Subjects who the investigator believes can and will comply with the requirements of the protocol</li> <li>• Written informed consent obtained from the subject</li> <li>• Male or female aged 40–85 years</li> <li>• Confirmed diagnosis of COPD based on post-bronchodilator spirometry (Gold et al. 2009), with FEV<sub>1</sub> ≤80% of predicted normal and FEV<sub>1</sub>/FVC &lt;0.7</li> <li>• Moderate, severe, or very severe COPD, according to GOLD staging (Gold et al. 2009)</li> <li>• Current or prior history of ≥10 pack years of cigarette smoking<sup>a,b</sup></li> <li>• Documented history of ≥1 exacerbation requiring antibiotics and/or oral corticosteroids or hospitalisation in the previous 12 months<sup>c</sup></li> </ul>                                                                                                                                                                                                                                              |
| Exclusion criteria | <ul style="list-style-type: none"> <li>• A confirmed diagnosis of asthma (as only cause of obstructive respiratory disorder), cystic fibrosis, pneumonia risk factors or other respiratory disorders (e.g., tuberculosis, lung cancer)</li> <li>• History of lung surgery</li> <li>• <math>\alpha</math>-1 antitrypsin deficiency as underlying cause of COPD</li> <li>• Moderate or severe COPD exacerbation not resolved at least 1 month prior to enrolment and less than 30 days following the last dose of oral corticosteroids<sup>d</sup></li> <li>• <u>Long-term corticosteroid or antibiotic therapy</u></li> <li>• Use of any antibacterial, antiviral or respiratory investigational drug or vaccine within 30 days of the enrolment visit</li> <li>• Evidence of alcohol or drug abuse</li> <li>• Presence of other conditions that the principal investigator judges may interfere with the study findings</li> <li>• Risk of non-compliance or inability to comply with the study procedures</li> <li>• Women who are pregnant or lactating or are planning on becoming pregnant during the study</li> </ul> |

<sup>a</sup> Former smokers are defined as those who have stopped smoking for at least 6 months

<sup>b</sup> Number of pack years = (number of cigarettes per day/20) x number of years smoked

<sup>c</sup> Subjects with recent COPD exacerbations, in stable condition, and having stopped antibiotics, can be enrolled one month post-exacerbation

<sup>d</sup> Subjects can be enrolled when their AECOPD or pneumonia has resolved

### Clinical data collection

Subjects are seen for an enrolment visit and then monthly for 2 years. Regular review of medications and, when required, changes to medical therapy and active smoking cessation advice are performed according to standard clinical practice at each visit. In addition to these scheduled visits, all subjects are seen in the clinic within 72 hours (3 days) of onset of symptoms of AECOPD. AECOPD is defined as worsening of at least 2 major symptoms (dyspnoea, sputum volume and sputum purulence) or worsening of at least 1 major symptom and 1 minor symptom (wheeze, sore throat, cold [nasal discharge and/or nasal congestion], cough and fever [oral temperature >37.5 °C] without other cause),<sup>28</sup> considered clinically relevant at the site. Exacerbations are identified by means of electronic diary cards that subjects complete daily. The data recorded daily in the electronic diary cards includes self-performed peak flow measurement (peak expiratory flow [PEF] and FEV<sub>1</sub>), a series of morning questions to identify symptoms of exacerbations<sup>29</sup> and the EXAcerbations of Chronic Pulmonary Disease Tool Version 1.0 (EXACT-PRO) at bedtime. Subjects are also asked to record any changes to their usual treatment. Data on patient-reported symptoms based on morning questions and on PEF/FEV<sub>1</sub> are transmitted daily to the study clinic. Changes/worsening in these symptoms are monitored by the study staff and subjects are contacted and invited to the clinic when an exacerbation is suspected.

### Study procedures

In addition to the daily monitoring undertaken through the patient-completed electronic diary cards, a wide range of study procedures are performed at study entry, scheduled monthly visits and exacerbation visits (**table 3**).

**Table 3** Overview of study assessments performed at the scheduled monthly visits and at exacerbation visits

| Description                                                             | Frequency of assessment*                                              |
|-------------------------------------------------------------------------|-----------------------------------------------------------------------|
| Clinical variables                                                      |                                                                       |
| Physical examination                                                    | Monthly and within 72 hours of onset of exacerbation                  |
| Anthropometrics and nutritional screening (MUST) <sup>a</sup>           | Quarterly                                                             |
| Intercurrent comorbidities                                              | Monthly and within 72 hours of onset of exacerbation                  |
| Medical history / medical record review                                 | Study entry and within 72 hours of onset of exacerbation              |
| Vaccination history                                                     | Annually                                                              |
| Current medication                                                      | Monthly                                                               |
| Smoking status                                                          | Monthly                                                               |
| Urine pregnancy test                                                    | Study entry, final visit and within 72 hours of onset of exacerbation |
| Chest CT-scan                                                           | Study entry and final visit                                           |
| Chest X-ray                                                             | Within 72 hours of onset of exacerbation                              |
| Lung function testing                                                   | Study entry and final visit                                           |
| Body box                                                                |                                                                       |
| TLCO <sup>b</sup>                                                       | Every 6 months and within 72 hours of onset of exacerbation           |
| Spirometry                                                              | Monthly and within 72 hours of onset of exacerbation                  |
| 6-minute walk test                                                      | Every 6 months                                                        |
| Questionnaires <a href="#">and patient-reported outcome instruments</a> |                                                                       |
| ATS-DLD-78A (Risk factors, disease history and smoking history)         | Study entry                                                           |

|    |                                                   |                                                             |
|----|---------------------------------------------------|-------------------------------------------------------------|
| 1  |                                                   |                                                             |
| 2  |                                                   |                                                             |
| 3  |                                                   |                                                             |
| 4  |                                                   |                                                             |
| 5  |                                                   |                                                             |
| 6  |                                                   |                                                             |
| 7  | Healthcare use <sup>c</sup>                       | Monthly and within 72 hours of onset of exacerbation        |
| 8  | mMRC <sup>d</sup>                                 | Every 6 months                                              |
| 9  |                                                   |                                                             |
| 10 | CAT questionnaire <sup>e</sup>                    | Quarterly and within 72 hours of onset of exacerbation      |
| 11 | EQ-5D index and VAS <sup>f</sup>                  | Quarterly and within 72 hours of onset of exacerbation      |
| 12 |                                                   |                                                             |
| 13 | NEADL <sup>g</sup>                                | Quarterly and within 72 hours of onset of exacerbation      |
| 14 |                                                   |                                                             |
| 15 | CNAQ <sup>h</sup>                                 | Quarterly and within 72 hours of onset of exacerbation      |
| 16 |                                                   |                                                             |
| 17 | Biological specimen collection                    |                                                             |
| 18 | Blood sampling                                    | Study entry                                                 |
| 19 | For routine biochemistry                          |                                                             |
| 20 | For cell-mediated immune response                 | Quarterly and within 72 hours of onset of exacerbation      |
| 21 | For biomarkers, blood counts and haematology      | Quarterly and within 72 hours of onset of exacerbation      |
| 22 | For RNA transcript profiling                      | Every 6 months and within 72 hours of onset of exacerbation |
| 23 | For vitamins, anti-oxidants and nutrients (20 ml) | Every 6 months and within 72 hours of onset of exacerbation |
| 24 |                                                   |                                                             |
| 25 |                                                   |                                                             |
| 26 | Nasopharyngeal swab sampling <sup>i</sup>         | Monthly and within 72 hours of onset of exacerbation        |
| 27 |                                                   |                                                             |
| 28 | Sputum sampling                                   | Monthly and within 72 hours of onset of exacerbation        |
| 29 | Breath sampling <sup>j</sup>                      | Monthly and within 72 hours of onset of exacerbation        |
| 30 |                                                   |                                                             |
| 31 | Urine sampling <sup>k</sup>                       | Monthly and within 72 hours of onset of exacerbation        |
| 32 |                                                   |                                                             |

\*In addition to study entry

<sup>a</sup>Height, weight, mid-arm circumference, waist circumference, triceps skin fold measurement, fat free body mass. <sup>b</sup>TLCO: transfer factor. <sup>c</sup>Healthcare use includes medication, vaccination, oxygen therapy, use of mechanical ventilation, pulmonary rehabilitation treatment, surgical intervention, outpatient visits (including GP visit contacts to COPD team), emergency room visits, hospitalisations, and productivity loss (time missed from work or usual activities due to worsening of COPD symptoms) <sup>d</sup>mMRC: Medical Research Council Dyspnea Scale score. <sup>e</sup>CAT: COPD Assessment Test. <sup>f</sup>VAS: visual analogue scale. <sup>g</sup>NEADL: Nottingham Extended Daily Activities Scale. <sup>h</sup>CNAQ: Council on Nutrition Appetite Questionnaire. <sup>i</sup>In all subjects at study entry and in a subcohort of 30 subjects during the first year. <sup>j</sup>In a subcohort of approximately 80 subjects. <sup>k</sup>In all subjects at study entry and within 72 hours of every exacerbation and in the subcohort of 30 subjects providing nasopharyngeal swabs during the first year of the study

### *Clinical assessments*

Quantitative high-resolution computed tomography scans are performed at enrolment and study conclusion to describe the degree of bronchiectasis and emphysema ~~resulting from COPD~~noted and to exclude other acute or evolving lung pathologies besides COPD and sequelae of COPD. A physical examination is performed at all visits. Medical history, smoking status and details of medication use are updated monthly. Influenza and pneumococcal vaccination status is updated annually.

Lung function testing is performed using spirometry, body plethysmography (lung volumes, body box) and single breath diffusion (gas transfer, TLCO) at specified visits. The following outcomes ~~will be~~are recorded: spirometry, FEV<sub>1</sub>, FVC, FEV<sub>1</sub>/FVC ratio, FEV<sub>1</sub> % predicted, mid expiratory flow between 25 and 75% of the forced vital capacity (MEF<sub>25-75</sub>), single breath diffusion (transfer factor [TLCO] and rate of carbon monoxide uptake [KCO]), and body plethysmography (total lung capacity [TLC], residual volume [RV], vital capacity [VC] and RV/TLC). At the enrolment visit, subjects are asked to refrain from using short-acting bronchodilators for at least 6 hours and long-acting bronchodilators for at least 12 hours before key procedures. Prior to the subsequent follow-up visits, subjects may use their usual medication normally. Lung function measurements are performed under controlled conditions and in the sitting position as per standard practice.

Anthropometrics (including but not restricted to height, weight, waist and mid-arm circumference and triceps skin-fold circumference) are measured quarterly. Grip strength and fatigability are measured using standard techniques. Anthropometric data are used to compute the Malnutrition Universal Screening Tool (MUST) score.<sup>30</sup>

1  
2  
3 Nutritional information (including planned/ unplanned weight loss, and history and  
4 changes in food intake patterns) is collected quarterly according to MUST guidelines.  
5  
6

7  
8 A postero-anterior chest X-ray (and lateral if required) is performed at all  
9 exacerbation visits, as per standard clinical practice, in order to exclude pneumonia.  
10  
11

12  
13 *Questionnaires [and patient-reported outcome instruments](#)*  
14

15 Various outcomes are assessed quarterly and at exacerbation using a series of  
16 questionnaires and patient-reported outcomes instruments such as the COPD  
17 Assessment Test (CAT),<sup>31</sup> the Nottingham Extended Daily Activities Scale  
18 (NEADL),<sup>32</sup> the Council on Nutrition Appetite Questionnaire (CNAQ),<sup>33</sup> and the EQ-  
19 5D.<sup>34</sup> The five items included in the EQ-5D index are mobility, self-care, usual  
20 activities, pain/discomfort and anxiety/depression. The BODE index (Body-Mass  
21 Index, Degree of Airflow Obstruction, Level of Functional Dyspnea, Exercise  
22 Capacity)<sup>35</sup> will also be calculated.  
23  
24  
25  
26  
27  
28  
29  
30  
31  
32  
33

34 Healthcare use is recorded at all visits, including medication, vaccination,  
35 oxygen therapy, use of mechanical ventilation, pulmonary rehabilitation treatment,  
36 surgical intervention, outpatient visits (including GP visits and telephone contacts to  
37 COPD team), emergency room visits, hospitalisations, and productivity loss (time  
38 missed from work or usual activities due to worsening of COPD symptoms). Potential  
39 changes in disease management following an exacerbation (e.g. change in medication  
40 use) are also recorded.  
41  
42  
43  
44  
45  
46  
47  
48

49 *Biological specimen collection*  
50

51 A wide range of biological specimens are collected from study participants (**table 3**).  
52  
53 Blood samples are collected from all patients at study entry, quarterly and at  
54 exacerbation. Sputum samples are obtained by spontaneous expectoration or induced  
55  
56  
57  
58  
59  
60

1  
2  
3 by stimulation according to standard methods from all patients at study entry, monthly  
4 and at exacerbation. Nasopharyngeal swabs are collected from all patients at study  
5 entry and then from a subcohort of 30 patients at monthly follow-up visits and at  
6 exacerbation during the first year of follow-up. Urine samples are collected from all  
7 patients at study entry and at exacerbation and from the subcohort of 30 patients at  
8 monthly follow-up visits during the first year. Breath samples are collected from  
9 approximately 80 patients (including the subcohort of 30 patients providing  
10 nasopharyngeal swabs) at monthly follow-up visits and at exacerbation visits during  
11 the first year.  
12  
13  
14  
15  
16  
17  
18  
19  
20  
21  
22

23 Blood samples are analysed for disease-related biomarkers, biochemistry, cell-  
24 mediated immune response, RNA profile and nutrients. Sputum samples are  
25 processed by traditional culture techniques and multiplex PCR analysis for  
26 identification of potential respiratory pathogens (including, but not limited to, non-  
27 typeable *H. influenzae*, *M. catarrhalis*, *S. pneumoniae*, *P. aeruginosa*, *Staphylococcus*  
28 *aureus*, respiratory syncytial virus, parainfluenza virus, rhinovirus, human  
29 metapneumovirus, influenza virus, adenovirus, and coronavirus). Sputum samples  
30 may also be analysed for disease-related biomarkers. Nasopharyngeal swabs are  
31 processed by traditional culture techniques and multiplex PCR analysis for potential  
32 pathogen identification. Urine samples may be processed for disease-related  
33 biomarkers. Breath samples are analysed by the selected ion flow tube mass  
34 spectrometry for identification of volatile organic compounds that may be  
35 characteristic for AECOPD.  
36  
37  
38  
39  
40  
41  
42  
43  
44  
45  
46  
47  
48  
49  
50  
51

52 Laboratory assays are performed at the Public Health Laboratory of Public Health  
53 England at University Hospital Southampton Foundation NHS Trust, GSK Vaccines  
54 central laboratory, and other GSK Vaccines designated laboratories. The assays use  
55  
56  
57  
58  
59  
60

1  
2  
3 standardised and validated procedures. Aliquots of all biological samples are  
4 processed (if applicable), frozen and stored for possible further disease-related testing.  
5  
6 Culture isolates are also stored. Any additional laboratory tests will be performed at a  
7  
8 GSK designated laboratory.  
9  
10

### 11 **Sample size calculation**

12  
13 The sample size calculation was based on the primary study endpoint of incidence of  
14  
15 all-cause AECOPD. Assuming that, on average, each subject is observed for a period  
16  
17 of 18 months and that 2 episodes of AECOPD can be expected per subject per year, if  
18  
19 120 subjects are followed, the number of total person-years would be around 180 and  
20  
21 during this time around 360 exacerbation events would be detected. If the distribution  
22  
23 of events per subject follows a Poisson distribution with no overdispersion, an  
24  
25 overdispersion factor of 1.5, or an overdispersion of 2, the approximate values of the  
26  
27 lower and upper bounds of the 95% confidence interval (CI) around the point estimate  
28  
29 of 2 events per subject per year would be 1.8-2.2, 1.7-2.3, and 1.7-2.3, respectively.  
30  
31 So a sample size of 120 subjects should ensure sufficient precision in the estimation  
32  
33 of the incidence rate of all-cause AECOPDs.  
34  
35  
36  
37  
38  
39

40 Additionally, in order to follow effectively 120 subjects, given the fact that  
41  
42 subjects may be eligible but withdraw quite early in the study possibly due to the  
43  
44 deterioration of the subject's health, the decision was taken to replace subjects who  
45  
46 withdrew during the first year of follow-up, and recruit additional subjects.  
47  
48

49 [We will construct a CONSORT diagram and capture where possible reasons for](#)  
50 [screen failure, drop-outs and loss to follow-up.](#)  
51  
52  
53  
54  
55  
56  
57  
58  
59  
60



## Data analysis

The co-primary study endpoints are the occurrence of all-cause AECOPD and the occurrence of AECOPD having sputum containing bacterial pathogens as detected by culture (overall and by species). The proportion of subjects at each visit for whom a sputum sample was obtained will be computed; overall and by the method the samples were obtained (spontaneous or induced). The proportion of sputum samples obtained at each visit and positive for specific bacterial pathogens (overall and by bacterial species) will also be calculated. The incidence rate of all-cause AECOPD and of AECOPD having sputum containing bacterial pathogens (overall and by bacterial species) will be calculated, with 95% CI. The 95% CI of the incidence rate will be computed using a model which accounts for repeated events, namely the generalised linear model assuming a negative binomial distribution for the response variable with logarithm as link function, and the logarithm of time for follow-up as an offset variable as a preliminary approach. Other flexible approaches to statistical analysis may also be used. In addition, the same model with covariates (e.g. smoking status at enrolment, number of moderate/severe exacerbations reported in the 12 months prior to enrolment, presence of respiratory pathogenic bacteria detected at the exacerbation visit and at previous visits) will be applied. Incidence rates will also be calculated for moderate AECOPD and for severe AECOPD.

## ETHICS AND DISSEMINATION

The AERIS study is conducted in accordance with the Declaration of Helsinki and Good Clinical Practice guidelines, and has been approved by the relevant institutional ethics and review board. All subjects must provide written informed consent to participate.

1  
2  
3 AERIS is being conducted in a specialised hospital that has extensive experience  
4 in respiratory research. AECOPD are proactively identified through patient-completed  
5 electronic diaries. After confirmation by phone, symptoms of an exacerbation trigger  
6 a clinic visit within 72 hours of symptom onset to enable comparisons of samples  
7 from same patient in stable COPD and during AECOPD. Although this is an intensive  
8 study with prolonged follow up, patients are expected to benefit from the improved  
9 access to expert care.  
10  
11  
12  
13  
14  
15  
16  
17

18  
19 The results obtained will be disseminated by presentations at international  
20 medical conferences and peer-reviewed publications. [Reporting will be in accordance](#)  
21 [with STROBE guidance.](#)  
22  
23  
24  
25

## 26 **DISCUSSION**

27  
28  
29 The AERIS study has been initiated to [comprehensively](#) assess the role of infectious  
30 pathogens in AECOPD in a well-characterised cohort of patients. The study aims [at](#)  
31 [exploring](#) the dynamics of airway infection and its possible contribution to  
32 AECOPD, as well as the potential role of chronic colonization in stable disease. The  
33 overall objective of the study will aim at refining the case definition of AECOPD to  
34 reflect the possible microbiological aetiology of exacerbations. This is of note, since  
35 there is currently no commonly agreed definition of AECOPD and no current case  
36 definition includes a microbiological endpoint. The impact of AECOPD on health-  
37 related quality-of-life and healthcare use will be assessed in order to provide a  
38 complete picture of disease burden. The interaction between airway infection and  
39 systemic manifestations of COPD and nutritional status will also be assessed [in detail](#)  
40 [for the first time.](#) Biological specimens collected during the study may also be used  
41 for further disease-related testing, including molecular typing to describe and compare  
42  
43  
44  
45  
46  
47  
48  
49  
50  
51  
52  
53  
54  
55  
56  
57  
58  
59  
60

1  
2  
3 selected biomarkers in AECOPD and stable COPD, to explore cell-mediated immune  
4 response to specific bacterial antigens, and to develop non-invasive bacterial  
5 diagnostic methods.  
6  
7  
8

9  
10 To our knowledge, few other studies have employed real-time electronic tracking  
11 of symptoms to identify AECOPD and potential aetiological triggers. This is  
12 important since available data suggest that up to 50% of exacerbations may not be  
13 reported to healthcare providers and consequently exacerbation rates are lower in  
14 studies employing event-based criteria to define AECOPD.<sup>36</sup> Due to the close daily  
15 monitoring of symptoms to identify AECOPD, we anticipate that the exacerbation  
16 rate in this study will be higher than previously reported. This close monitoring and  
17 early therapeutic intervention at exacerbation may also impact on estimates of the  
18 overall burden of disease.  
19  
20  
21  
22  
23  
24  
25  
26  
27  
28

29  
30 A number of other epidemiological studies have been initiated in recent years to  
31 further characterize our understanding of the natural history of AECOPD. However, it  
32 is important to recognise that most of these studies have not included molecular  
33 microbiological assessments. Recent large observational studies focusing on  
34 biomarker discovery have involved close phenotyping of COPD patients, but have not  
35 studied the aetiology of exacerbations in depth.<sup>37-39</sup> In another study, potentially  
36 pathogenic bacterial strains were identified using molecular typing techniques,  
37 although viruses as potential airway pathogens were not investigated.<sup>21</sup> More recently,  
38 the prevalence and load of airway bacteria in stable and exacerbated AECOPD have  
39 been assessed in paired samples from 52 patients participating in the London COPD  
40 cohort study using modern molecular techniques.<sup>19</sup> Airway bacterial prevalence and  
41 load was found to increase significantly during AECOPD, with quantitative molecular  
42 techniques proving more discriminatory than culture. However, assessment was  
43  
44  
45  
46  
47  
48  
49  
50  
51  
52  
53  
54  
55  
56  
57  
58  
59

20

1  
2  
3 limited to only the three most commonly detected airway bacteria (*H. influenzae*, *S.*  
4 *pneumoniae*, and *M. catarrhalis*). However, other potential pathogens and the overall  
5 respiratory microbiome may also contribute and have not yet been studied in  
6 detail.<sup>17,18,20,40,41</sup> In AERIS, samples will be acquired during both AECOPD and stable  
7 disease and analysed for a wide range of potentially pathogenic bacteria and viruses  
8 using advanced PCR-based techniques as well as traditional culture-based methods.  
9  
10  
11  
12  
13  
14  
15

16  
17 A major strength of the AERIS study design is the comprehensive assessment of  
18 clinical status, microbiology, functional status, nutritional status, health-related  
19 quality-of-life and healthcare resource utilisation in individual patients in a single  
20 large cohort during both stable COPD and AECOPD. The selection of subjects with a  
21 history of at least a single exacerbation enriches the cohort to some degree and  
22 ensures an adequate number of exacerbations are sampled. It is accepted that some  
23 aspects of the analysis may not be generalizable to the subgroup of patients who never  
24 exacerbate. The analyses proposed in this study will generate epidemiological data to  
25 complement that derived from existing COPD cohorts and further explore  
26 determinants of COPD and the contribution of bacterial and viral pathogens to  
27 AECOPD, as well as to provide some understanding of the limitations of existing  
28 data. As exacerbation visits are triggered by patient diary data, accurate and timely  
29 diary completion is essential. All subjects participating in this study receive diary  
30 training at enrolment and support is available from the study team at all times to  
31 promote accurate and complete diary keeping. Cohort retention is a key factor in the  
32 successful delivery of such a study and with in-depth sampling protocols, participant  
33 engagement, comfort and feedback are key factors in optimising cohort retention and  
34 comprehensive data collection.  
35  
36  
37  
38  
39  
40  
41  
42  
43  
44  
45  
46  
47  
48  
49  
50  
51  
52  
53  
54  
55  
56  
57  
58  
59  
60

1  
2  
3 Identification of novel approaches for the prevention of AECOPD is an important  
4 research goal. Long-acting beta-agonists (LABA) and long-acting anti-muscarinic  
5 bronchodilators remain the cornerstone of treatment for patients with COPD.<sup>42</sup>  
6  
7 Combinations of LABA and inhaled corticosteroids are also used in patients with  
8 more severe disease and/or frequent exacerbations. Long-term treatment with  
9 macrolide antibiotics and pulsed quinolone therapy may be considered for  
10 exacerbation prevention.<sup>7,43,44</sup> However, concerns exist about the potential for  
11 development of antimicrobial resistance during long-term antibiotic therapy.  
12  
13 Numerous other approaches are under investigation for the prevention of AECOPD,  
14 including anti-inflammatory drugs, immunomodulatory agents, immunotherapy,  
15 antioxidants and non-pharmacologic strategies. Vaccination is another potential  
16 approach meriting investigation for reducing AECOPD risk. However, optimal  
17 strategies targeting key respiratory pathogens are not yet available to the clinician.  
18  
19  
20  
21  
22  
23  
24  
25  
26  
27  
28  
29  
30  
31

32 In conclusion, there have been considerable advances in our understanding of the  
33 epidemiology, pathophysiology and clinical management of COPD in recent years.  
34 However, there remains a genuine need to further explore the aetiology and  
35 pathogenesis of AECOPD. It is anticipated that results of this epidemiological study  
36 will increase our understanding of the contribution of bacterial and viral pathogens to  
37 AECOPD, the natural history of these events in association with the timing of  
38 symptoms and physiological changes, and will offer new direction potentially leading  
39 to for research into targeted therapeutic and preventative interventions.  
40  
41  
42  
43  
44  
45  
46  
47  
48  
49

50 **Contributors S. Bourne:** principle investigator, closely involved in all steps of the  
51 study and specifically wrote substantial parts of the protocol; **C. Cohet:**  
52 **e**pidemiologist responsible for this observational study was closely involved in the  
53 design of study; **V. Kim and A. Barton:** co-investigators and closely involved in the  
54  
55  
56  
57  
58  
59  
60

1  
2  
3 conduct of this study; **A. Tuck**: site project manager for microbiology testing and  
4 involved in writing of microbiology parts of the protocol; **E. Aris**: project statistician,  
5 responsible for writing of statistical analysis plan and definition of statistical  
6 outcomes; **S. Mesia Vela**: project manager, closely involved in the discussion on  
7 design and follow-up of the study; **J-M. Devaster**: ~~d~~Director of clinical research and  
8 translational sScience, closely involved in all discussions and study accountable  
9 person; **W.R. Ballou**: vice-president of clinical research and translational sScience  
10 team, closely involved in all discussions of design of this study. **S. Clarke**: co-  
11 investigator, closely involved in all steps of the study. **T. Wilkinson**: coordinating  
12 lead investigator, involved in all steps of the study.  
13  
14  
15  
16  
17  
18  
19  
20  
21  
22  
23  
24

25 All authors provided intellectual input into the development of this manuscript. And  
26 have critically reviewed and approved the final manuscript.  
27  
28  
29

30 **Funding** GlaxoSmithKline Biologicals SA funded this study and paid for all costs  
31 associated with the development and publishing of the present manuscript.  
32  
33  
34

35 **Competing Interests** S. Bourne, V. Kim, A. Barton, A. Tuck, S. Clarke and T.  
36 Wilkinson received an institutional grant from GlaxoSmithKline (GSK) group of  
37 companies to conduct this study. S. Bourne reports receiving grants, advisory board  
38 fees and assistance in attending conferences from GSK. He has also received fees for  
39 lecturing, advisory boards and teaching from Novartis, Astra Zeneca and Boehringer  
40 Ingelheim. S. Clarke has also received project grant support, conference funding  
41 attendance and advisory board payments from Pfizer, GSK and Novartis (all  
42 payments were made to employing institution). T. Wilkinson has also received travel  
43 expenses, fees for advisory boards GSK related to this study, fees for advisory boards  
44 from Pfizer and AstraZeneca, reimbursement for travel and conference attendance  
45  
46  
47  
48  
49  
50  
51  
52  
53  
54  
55  
56  
57  
58  
59  
60

1  
2  
3 from Boehringer Ingelheim, consultancy fees from Almirall, and financial support  
4  
5 from Novartis and Retroscreen (travel expenses, consultancy and project support  
6  
7 costs). C. Cohet, E. Aris, S. Mesia Vela, J-M. Devaster and W.R. Ballou are  
8  
9 employed by GSK; C. Cohet, E. Aris, J-M Devaster and W.R. Ballou also report GSK  
10  
11 stock options.  
12  
13

14 **Acknowledgments** We wish to thank the COPD patients and their carers who are  
15 participating for their participation in this study. We also wish to acknowledge the  
16  
17 support of the Southampton National Institute for Health Research (NIHR) Wellcome  
18  
19 Trust Clinical Research Facility (CRF) the Southampton NIHR Biomedical Research  
20  
21 Centre (BRC) and the NIHR Southampton Respiratory Biomedical Research Unit  
22  
23 (RBRU). The CRF, BRC and RBRU are funded by NIHR and are a partnership  
24  
25 between the University of Southampton and University Hospital Southampton NHS  
26  
27 Foundation Trust (UHS). We also acknowledge Kerry Gove (University of  
28  
29 Southampton) for lung function measurements, Dr Tony Williams (University of  
30  
31 Southampton) for cell-mediated immunity sample capture, Dr Steve Wootton and  
32  
33 Kesta Durkin (UHS) for nutritional assessments, Dr Stephen Harden (UHS) for  
34  
35 supervision of CT scanning and Sister Lindsay Welch (UHS) for leading the nursing  
36  
37 team. We thank local patient groups, including the British Lung Foundation Breathe  
38  
39 Easy groups, for their continued support. The authors would also like to acknowledge  
40  
41 the GSK Vaccines study team: Sylvia Taylor (epidemiology team), Pascale  
42  
43 Lallemand and Rosalia Calamera (data management), Marcela Gavigan (clinical  
44  
45 operations), Seona McGregor and Rebecca White (local support), Silvia Damaso and  
46  
47 Maxim Blum (statistical support), Peter Vink (input in the design) and Marie-Josée  
48  
49 Uwamahoro. We also thank Jennifer Coward (independent writer on behalf of GSK  
50  
51  
52  
53  
54  
55  
56  
57  
58  
59  
60

Vaccines) for scientific writing support and Wouter Houthoofd (XPE Pharma and Science, on behalf of GSK Vaccines) for publication coordination.

## REFERENCES

1. Decramer M, Janssens W, Miravittles M. Chronic obstructive pulmonary disease. *Lancet* 2012;379:1341–51.
2. Bousquet J, Kiley J, Bateman ED, et al. Prioritized research agenda for prevention and control of chronic respiratory diseases. *Eur Respir J* 2010;36:995–1001.
3. Lozano R, Naghavi M, Foreman K, et al. Global and regional mortality from 235 causes of death for 20 age groups in 1990 and 2010: a systemic analysis for the Global Burden of Disease Study 2010. *Lancet* 2012;380:2095–128.
4. Vos T, Flaxman AD, Lozano R, et al. Years lived with disability (YLDs) for 1160 sequelae of 289 diseases and injuries 1990–2010: a systemic analysis for the Global Burden of Disease Study 2010. *Lancet* 2012;380:2163–96.
5. Murray CJ, Vos T, Lozano R, et al. Disability-adjusted life years (DALYs) for 291 diseases and injuries in 21 regions, 1990–2010: a systemic analysis for the Global Burden of Disease Study 2010. *Lancet* 2012;380: 2197–223.
6. Loddenkemper R, Gibson GJ, Sibbille Y. European Respiratory Society/European Lung Foundation. *European Lung White Book. The First Comprehensive Survey on Respiratory Health in Europe*. Sheffield, England: European Respiratory Society Journals Ltd, 2003.



- 1  
2  
3 7. Seemungal TA, Wilkinson TM, Hurst JR, et al. Long-term erythromycin therapy  
4 is associated with decreased chronic obstructive pulmonary disease  
5 exacerbations. *Am J Respir Crit Care Med* 2008;178:1139–47.  
6  
7
- 8  
9  
10 8. Donaldson GC, Seemungal TA, Bhowmik A, Wedzicha JA. Relationship  
11 between exacerbation frequency and lung function decline in chronic obstructive  
12 pulmonary disease. *Thorax* 2002;57:847–52.  
13  
14
- 15 9. Miravittles M, Ferrer M, Pont A, et al. Effect of exacerbations on quality of life  
16 in patients with chronic obstructive pulmonary disease: a 2 year follow up study.  
17 *Thorax* 2004;59:387–95.  
18  
19
- 20 10. Soler-Cataluña JJ, Martínez-García MA, Román Sánchez P, et al. Severe acute  
21 exacerbations and mortality in patients with chronic obstructive pulmonary  
22 disease. *Thorax* 2005;60:925–31.  
23  
24
- 25 11. Nishimura K, Sato S, Tsukino M, et al. Effect of exacerbations on health status in  
26 subjects with chronic obstructive pulmonary disease. *Health Qual Life Outcomes*  
27 2009;7:69.  
28  
29
- 30 12. Sullivan SD, Ramsey SD, Lee TA. The economic burden of COPD. *Chest*  
31 2000;117(2 Suppl):5S–9S.  
32  
33
- 34 13. Hurst JR, Vestbo J, Anzueto A, et al. Susceptibility to exacerbation in chronic  
35 obstructive pulmonary disease. *N Engl J Med* 2010;363:1128–38.  
36  
37
- 38 14. Papi A, Bellettato CM, Braccioni F, et al. Infections and airway inflammation in  
39 chronic obstructive pulmonary disease severe exacerbations. *Am J Respir Crit*  
40 *Care Med* 2006;173:1114–21.  
41  
42  
43  
44  
45  
46  
47  
48  
49  
50  
51  
52  
53  
54  
55  
56  
57  
58  
59  
60

- 1  
2  
3 15. Sethi S, Murphy TF. Infection in the pathogenesis and course of chronic  
4 obstructive pulmonary disease. *N Engl J Med* 2008;359:2355–65.  
5  
6
- 7  
8 16. Hilty M, Burke C, Pedro H, et al. Disordered microbial communities in asthmatic  
9 airways. *PLoS One* 2010;5:e8578.  
10
- 11  
12 17. Huang YJ, Kim E, Cox MJ, et al. A persistent and diverse airway microbiota  
13 present during chronic obstructive pulmonary disease exacerbations.  
14 *OMICS* 2010;14:9–59.  
15  
16
- 17  
18 18. Erb-Downward JR, Thompson DL, Han MK, et al. Analysis of the lung  
19 microbiome in the "healthy" smoker and in COPD. *PLoS One* 2011;6:e16384.  
20  
21
- 22  
23 19. Garcha DS, Thurston SJ, Patel AR, et al. Changes in prevalence and load of  
24 airway bacteria using quantitative PCR in stable and exacerbated COPD. *Thorax*  
25 2012;67:1075–80.  
26  
27
- 28  
29 20. Pragman AA, Kim HB, Reilly CS, et al. The lung microbiome in moderate and  
30 severe chronic obstructive pulmonary disease. *PLoS One* 2012;7:e47305.  
31  
32
- 33  
34 21. Sethi S, Evans N, Grant BJ, Murphy TF. New strains of bacteria and  
35 exacerbations of chronic obstructive pulmonary disease. *N Engl J Med*  
36 2002;347:465–71.  
37  
38
- 39  
40 22. Rosell A, Monsó E, Soler N, et al. Microbiologic determinants of exacerbation in  
41 chronic obstructive pulmonary disease. *Arch Intern Med* 2005;165:891–97.  
42  
43
- 44  
45 23. Patel IS, Seemungal TA, Wilks M, et al. Relationship between bacterial  
46 colonisation and the frequency, character, and severity of COPD exacerbations.  
47 *Thorax* 2002;57:759–64.  
48  
49  
50  
51  
52  
53  
54  
55  
56  
57  
58  
59  
60

- 1  
2  
3  
4  
5  
6  
7  
8  
9  
10  
11  
12  
13  
14  
15  
16  
17  
18  
19  
20  
21  
22  
23  
24  
25  
26  
27  
28  
29  
30  
31  
32  
33  
34  
35  
36  
37  
38  
39  
40  
41  
42  
43  
44  
45  
46  
47  
48  
49  
50  
51  
52  
53  
54  
55  
56  
57  
58  
59  
60
24. Wilkinson TM, Patel IS, Wilks M, et al. Airway bacterial load and FEV1 decline in patients with chronic obstructive pulmonary disease. *Am J Respir Crit Care Med* 2003;167:1090–5.
25. Marin A, Garcia-Aymerich J, Sauleda J, et al. Effect of bronchial colonisation on airway and systemic inflammation in stable COPD. *COPD* 2012;9:121–30.
26. Sethi S, Sethi R, Eschberger K, et al. Airway bacterial concentrations and exacerbations of chronic obstructive pulmonary disease. *Am J Respir Crit Care Med* 2007;176:356–61.
27. Global Initiative for Chronic Obstructive Lung Disease, Inc. Global strategy for the diagnosis, management, and prevention of COPD (Revised 2011). [http://www.goldcopd.org/uploads/users/files/GOLD\\_Report\\_2011\\_Feb21.pdf](http://www.goldcopd.org/uploads/users/files/GOLD_Report_2011_Feb21.pdf) (accessed ~~12 Feb 4 Oct~~ 2014~~3~~).
28. Anthonisen NR, Manfreda J, Warren CP, et al. Antibiotic therapy in exacerbations of chronic obstructive pulmonary disease. *Ann Intern Med* 1987;106:196–204.
29. Wilkinson TM, Donaldson GC, Hurst JR, et al. Early therapy improves outcomes of exacerbations of chronic obstructive pulmonary disease. *Am J Respir Crit Care Med* 2004;169:1298–1303.
30. BAPEN. The MUST toolkit. <http://www.bapen.org.uk/screening-for-malnutrition/must/must-toolkit/the-must-itself> (accessed ~~12 Feb 4 Oct~~ 2014~~3~~).
31. Jones PW, Brusselle G, Dal Negro RW, et al. Properties of the COPD assessment test in a cross-sectional European study. *Eur Respir J* 2011;38:29–35.

- 1  
2  
3 32. Nouri FM, Lincoln NB. An extended activities of daily living scale for stroke  
4 patients. *Clinical Rehab* 1987;1:301–5.  
5  
6  
7  
8 33. Wilson MM, Thomas DR, Rubenstein LZ, et al. Appetite assessment: simple  
9 appetite questionnaire predicts weight loss in community-dwelling adults and  
10 nursing home residents. *Am J Clin Nutr* 2005;82:1074–81.  
11  
12  
13 34. The EuroQol Group. EuroQol – a new facility for the measurement of health-  
14 related quality of life. *Health Policy* 1990;16:199–208.  
15  
16  
17 35. Celli BR, Cote CG, Marin JM, et al. The body-mass index, airflow obstruction,  
18 dyspnea, and exercise capacity index in chronic obstructive pulmonary disease. *N*  
19 *Engl J Med* 2004;350:1005–12.  
20  
21  
22 36. Hurst JR, Wedzicha JA. An introduction to conducting COPD exacerbation  
23 research. *Respir Med: COPD Update* 2009;5:38–44.  
24  
25  
26 37. Vestbo J, Anderson W, Coxson HO, et al. Evaluation of COPD longitudinally to  
27 identify predictive surrogate end-points (ECLIPSE). *Eur Respir J* 2008;31:869–  
28 73.  
29  
30  
31 38. Regan EA, Hokanson JE, Murphy JR, et al. Genetic epidemiology of COPD  
32 (COPDGene) study design. *COPD* 2010;7:32–43.  
33  
34  
35 39. Woodruff PG. Novel outcomes and end points: biomarkers in chronic obstructive  
36 pulmonary disease clinical trials. *Proc Am Thorac Soc* 2011; 8:350–5.  
37  
38  
39 40. Beasley V, Joshi PV, Singanayagam A, et al. Lung microbiology and  
40 exacerbations in COPD. *Int J Chron Obstruct Pulmon Dis* 2012;7:555–69.  
41  
42  
43 41. Mackay AJ, Hurst JR. COPD exacerbations: causes, prevention, and treatment.  
44 *Med Clin North Am* 2012;96:789–809.  
45  
46  
47  
48  
49  
50  
51  
52  
53  
54  
55  
56  
57  
58  
59  
60

- 1  
2  
3 42. Global Initiative for Chronic Obstructive Lung Disease, Inc. Global strategy for  
4 the diagnosis, management, and prevention of COPD (Updated 2013).  
5 [http://www.goldcopd.org/uploads/users/files/GOLD\\_Report\\_2013\\_Feb20.pdf](http://www.goldcopd.org/uploads/users/files/GOLD_Report_2013_Feb20.pdf)  
6  
7  
8  
9  
10 (accessed ~~12 Feb 4 Oct 2014~~ 13).
- 11  
12 43. Sethi S, Jones PW, Theron MS, et al. Pulsed moxifloxacin for the prevention of  
13 exacerbations of chronic obstructive pulmonary disease: a randomized controlled  
14 trial. *Respir Res* 2010;11:10.  
15  
16  
17  
18  
19 44. Albert RK, Connett J, Bailey WC, et al. Azithromycin for prevention of  
20 exacerbations of COPD. *N Engl J Med* 2011;365:689–98.  
21  
22  
23  
24  
25  
26  
27  
28  
29  
30  
31  
32  
33  
34  
35  
36  
37  
38  
39  
40  
41  
42  
43  
44  
45  
46  
47  
48  
49  
50  
51  
52  
53  
54  
55  
56  
57  
58  
59  
60
